# 1 **Temporal Genetic Dynamics of an Experimental, Biparental Field**

## 2 **Population of *Phytophthora capsici***

3 Maryn O. Carlson<sup>1,2</sup>, Elodie Gazave<sup>2</sup>, Michael A. Gore<sup>2\*</sup>, Christine D. Smart<sup>1\*</sup>

4  
5 <sup>1</sup>Plant Pathology and Plant-Microbe Biology Section, School of Integrative Plant Science,  
6 Cornell University, Geneva, NY 14456

7 <sup>2</sup>Plant Breeding and Genetics Section, School of Integrative Plant Science, Cornell University,  
8 Ithaca, NY 14853

9  
10 \*Co-corresponding authors

11 Email: mag87@cornell.edu (MAG); cds14@cornell.edu (CDS)

12  
13

### 14 **Abstract**

15 Defining the contributions of dispersal, reproductive mode, and mating system to the  
16 population structure of a pathogenic organism is essential to estimating its evolutionary potential.  
17 After introduction of the devastating plant pathogen, *Phytophthora capsici*, into a grower's field,  
18 a lack of aerial spore dispersal restricts migration. Once established, coexistence of both mating  
19 types results in formation of overwintering recombinant oospores, engendering persistent  
20 pathogen populations. To mimic these conditions, in 2008, we inoculated a field with two *P.*  
21 *capsici* isolates of opposite mating type. We analyzed pathogenic isolates collected in 2009-13  
22 from this experimental population, using genome-wide single-nucleotide polymorphism markers.  
23 By tracking heterozygosity across years, we show that the population underwent a generational  
24 shift; transitioning from exclusively F<sub>1</sub> in 2009-10; mixed generational in 2011; and ultimately  
25 all inbred in 2012-13. Survival of F<sub>1</sub> oospores, characterized by heterozygosity excess, coupled  
26 with a low rate of selfing, delayed declines in heterozygosity due to inbreeding and attainment of  
27 equilibrium genotypic frequencies. Large allele and haplotype frequency changes in specific  
28 genomic regions accompanied the generational shift, representing putative signatures of  
29 selection. Finally, we identified an approximately 1.6 Mb region associated with mating type  
30 determination, constituting the first detailed genomic analysis of a mating type region (MTR) in

31 *Phytophthora*. Segregation patterns in the MTR exhibited tropes of sex-linkage, where  
32 maintenance of allele frequency differences between isolates of opposite mating type was  
33 associated with elevated heterozygosity despite inbreeding. Characterizing the trajectory of this  
34 experimental system provides key insights into the processes driving persistent, sexual pathogen  
35 populations.

36

## 37 **Introduction**

38 *Phytophthora capsici* is the filamentous, soil-borne oomycete plant pathogen responsible  
39 for Phytophthora blight, a disease inflicting significant annual crops losses worldwide (Erwin  
40 and Ribeiro, 1996; Granke et al., 2012; Hausbeck and Lamour, 2004; Lamour et al., 2012).  
41 Success of *P. capsici* is facilitated by its widespread ability to overcome fungicides (Lamour and  
42 Hausbeck, 2000), dearth of resistant cultivars (Granke et al., 2012), and large, diverse host range  
43 (comprising >15 plant families), including widely grown, economically important vegetable  
44 crops in the *Cucurbitaceae*, *Solanaceae*, and *Fabaceae* plant families (Hausbeck and Lamour,  
45 2004; Sator and Butler, 1967; Tian and Babadoost, 2004). Extreme weather events often initiate  
46 new infestations by introducing inoculum into agricultural fields via flood waters (Dunn et al.,  
47 2010). Contaminated soil and infected plant material are commonly implicated in pathogen  
48 spread (Granke et al., 2012), however, *P. capsici* is not aerielly dispersed (Granke et al., 2009).

49 Once introduced into a field, the explosive asexual cycle of *P. capsici* catalyzes the rapid  
50 escalation of disease within a growing season. When exposed to water saturated conditions, a  
51 single sporangium can release 20-40 zoospores, each capable of inciting root, crown, or fruit rot,  
52 the characteristic symptoms of Phytophthora blight (Hausbeck and Lamour, 2004). For sexual  
53 reproduction, the heterothallic *P. capsici* requires two mating types, classically referred to as A1  
54 and A2 (Erwin and Ribeiro, 1996). Exposure to mating type specific hormones ( $\alpha 1$  and  $\alpha 2$ )  
55 stimulates production of the gametangia, subsequent outcrossing, and formation of recombinant  
56 oospores (Ko, 1988). However, both mating types produce both male and female gametangia,  
57 and thus are capable of self-fertilization (Ko, 1988; Shattock, 1986), which is thought to occur at  
58 a lower rate relative to outcrossing in *P. capsici* (Dunn et al., 2014; Uchida and Aragaki, 1980).

59 While the asexual reproductive cycle directly inflicts crop damage, sexual reproduction  
60 confers several epidemiological advantages. First, unlike asexual propagules, oospores survive  
61 exposure to cold temperatures (Babadoost and Pavon, 2013; Hausbeck and Lamour, 2004). Thus,

62 in regions with cold winter conditions, oospores are the primary source of overwintering  
63 inoculum (Bowers, 1990; Granke et al., 2012; Lamour and Hausbeck, 2003). Second, oospores  
64 remain in the soil for years regardless of host availability, enabling the persistence of the  
65 pathogen between growing seasons and rendering eradication unfeasible. In the spring, in the  
66 presence of susceptible hosts, germinating oospores, potentially formed in distinct years, initiate  
67 the repeating, asexual reproductive cycle (Granke et al., 2012; Hausbeck and Lamour, 2004).

68 Where both mating types coexist, sexual reproduction is associated with persistent  
69 pathogen populations, genetic diversity, and an approximate 1:1 ratio of A1 to A2 mating types  
70 (Dunn et al., 2010; Lamour and Hausbeck, 2001). While asexual reproduction can increase the  
71 prevalence of a specific genotype within a sexually reproducing population, the inability of  
72 asexual propagules to survive cold winters (Babadoost and Pavon, 2013; Hausbeck and Lamour,  
73 2004) implies that each year meiosis disrupts linkage between the particular combination of  
74 alleles observed within a clone (Kondrashov, 1988). As a consequence, sexual reproduction  
75 mediates the effects of clonal propagation on *P. capsici* population structure (Lamour and  
76 Hausbeck, 2001). Furthermore, in geographic regions where sexual reproduction occurs, genetic  
77 differentiation between field populations, even within close proximity, suggests that after an  
78 initial introduction limited gene flow occurs between fields (Dunn et al., 2010; Lamour and  
79 Hausbeck, 2001), consistent with a lack of aerial dispersal (Granke et al., 2009).

80 Given this infection scenario, i.e. an initial inoculation but no subsequent introductions,  
81 we would expect *P. capsici* populations to exhibit signatures of a bottleneck event: reductions in  
82 genetic diversity and an increase in inbreeding over time, proportional to the number of founding  
83 isolates (Kirkpatrick and Jarne, 2000). (We define inbreeding strictly as inter-mating between  
84 related isolates, and reserve selfing to refer to self-fertilization events.) In populations which  
85 undergo a so-called founder effect, inbreeding is expected to decrease mean population fitness  
86 over time due to the expression of recessive deleterious alleles, i.e. the genetic load, in the  
87 homozygous state (Charlesworth and Charlesworth, 1987; Hartl and Clark, 2007). A related  
88 phenomenon, inbreeding depression, i.e. the difference in fitness between selfed and outcrossed  
89 progeny in a population (Kirkpatrick and Jarne, 2000), is considered a major driver of obligate  
90 outcrossing, and may contribute to maintenance of self-incompatibility in hermaphroditic plant  
91 species (Charlesworth and Charlesworth, 1987). Charting the genetic trajectory of isolated

92 populations of *P. capsici* in the context of these processes, is essential to understanding pathogen  
93 evolution in an agriculturally relevant scenario.

94 Thus, in 2008, to investigate the response of *P. capsici* to a severe bottleneck, we  
95 established a closed, biparental field population, by inoculating a research field once with two  
96 heterozygous strains of opposite mating types. In a preliminary study, we tracked the allele and  
97 genotypic frequencies of five microsatellite markers in the field population from 2009-12 (Dunn  
98 et al., 2014). We demonstrated that sexual reproduction resulted in high genotypic diversity, a  
99 function of the proportion of unique isolates (Grünwald et al., 2003), in 2009-11, with a  
100 reduction in genotypic diversity in 2012. However, five markers afforded limited statistical  
101 power to characterize population and individual level phenomena.

102 Therefore, in the present study, we analyzed isolates collected in 2009-13 from the *P.*  
103 *capsici* field population with genotyping-by-sequencing (GBS), a multiplexed reduced-  
104 representation sequencing technique, which simultaneously identifies and scores single  
105 nucleotide polymorphism (SNP) markers distributed throughout the genome (Elshire et al.,  
106 2011). The closed experimental field design excluded introduction of new alleles via migration,  
107 providing a unique opportunity to address the influence of inbreeding on population genetic  
108 phenomena in *P. capsici*. In high-density SNP genotyping isolates from the biparental field  
109 population, our goal was threefold: 1) Evaluate the effects of oospore survival on population  
110 structure; 2) Quantify the genome-wide incidence of inbreeding; and 3) Identify whether specific  
111 regions deviate from the rest of the genome in terms of changes in allele frequency.

## 112 **Results**

### 113 **GBS of the experimental biparental isolates and validation**

114 We genotyped 232 isolates collected from a closed, biparental field population of *P.*  
115 *capsici* from 2009-13. All field isolates were collected from infected plant tissue, and are  
116 therefore, by definition, pathogenic. Additionally, we genotyped 46 single-oospore progeny from  
117 an *in vitro* cross between the same founding parents as a reference for the field isolates, for  
118 which generation was *a priori* unknown. Three of the *in vitro* progeny were identified as putative  
119 selfs by Dunn et al. (2014), which was confirmed by our analysis (see 'Selfing in the lab and  
120 field'), and are hereafter referred to as *in vitro* selfs to distinguish them from the *in vitro* F<sub>1</sub>  
121 progeny. The A1 (isolate: 0664-1) and A2 (isolate: 06180-4) founding parents were genotyped

122 14 and 11 times, respectively, to estimate laboratory and genotyping errors (Supplementary table  
123 S1).

124 Out of the 401,035 unfiltered variant calls, initial site filters reduced the data set to  
125 23,485 high-quality SNPs (Supplementary Figure S1), with an average SNP call rate (i.e. the  
126 percentage of individuals successfully genotyped at each SNP) of 95.93% (median of 97.64%).  
127 The 23,485 SNPs were equally distributed among 307 scaffolds (scaffold size and number of  
128 SNPs were highly correlated ( $r^2=0.95$ )), with an average SNP density of approximately 1 SNP  
129 every 2.5 kb. There was essentially no correlation between mean individual read depth and  
130 heterozygosity per SNP among all isolates ( $r^2=0.009$ ,  $P$ -value=0.10), indicating that  
131 heterozygous calling post-filtering was robust to differences in mean individual sequencing  
132 coverage (Supplementary Figure S2). Genotype files are available in VCF format upon request.

133 To assess SNP genotyping accuracy, we compared biological and technical replicates of  
134 the parental isolates. Replicates of the A1 parent ( $n=14$ ) and A2 parent ( $n=11$ ), representing 4-5  
135 distinct serial cultures, shared on average 98.30% ( $s=0.45\%$ ) and 98.17% ( $s=0.51\%$ ) alleles  
136 identity-by-state (IBS), respectively (Supplementary Table S1). This corresponded to 3.60%  
137 ( $s=0.86\%$ ) discordant sites on average among non-missing genotypes between replicates. Lower  
138 average discordance ( $\bar{x}=2.86\%$ ,  $s=0.33\%$ ) between only replicates of the same parental culture  
139 ( $n=54$  pairwise comparisons) suggested variation associated with distinct culture time points.  
140 Therefore, our overall genotyping error rate, inclusive of variation in mycelial and DNA  
141 extractions, but not different culture time points, was approximately 3%. Among technical  
142 replicates [same DNA sample ( $n=4$ ) sequenced 3-4 times] the error rate was on average 2.95%,  
143 indicating that most of the genotype discrepancies were attributed to sequencing and genotyping  
144 errors rather than distinct mycelial harvests. When we excluded heterozygous calls in each  
145 pairwise comparison ( $n=21$ ) of the technical replicates, less than 0.0001% sites were discordant,  
146 indicating that heterozygote genotype discrepancies drove genotyping errors. As in the total data  
147 set, the association between individual sequencing coverage and heterozygosity was negligible in  
148 both sets of parental replicates (Supplementary Figure S2).

149 *Phytophthora capsici* reproduces asexually, therefore, it was theoretically possible to  
150 sample the same genotype from the field multiple times within a year. To remove the bias  
151 imparted on population genetic analyses by including clones, we retained only one isolate for  
152 each identified unique genotype (Milgroom, 1996). Pairwise identity-by-state (IBS) between

153 replicates of the A1 and A2 parental isolates were compared to establish a maximum genetic  
154 similarity threshold to define clones (see Methods), akin to (Meirmans and van Tienderen, 2004;  
155 Rogstad et al., 2002). Applying this threshold, we identified 160 unique field isolates out of the  
156 initial 232 field isolates (Supplementary Table S2). Two *in vitro* isolates and one field isolate  
157 were identified as outliers with respect to deviation from the expected 1:1 ratio of allele depths at  
158 heterozygous sites ( $n=2$ ) or heterozygosity ( $n=1$ ), and subsequently removed (Supplementary  
159 Figure S3). Previous studies have shown that deviation from a 1:1 ratio of allele depths at  
160 heterozygous sites, the expectation for diploid individuals, is correlated with ploidy variation (Li  
161 et al., 2015; Rosenblum et al., 2013; Yoshida et al., 2013), therefore the two allele depth ratio  
162 outliers provide preliminary evidence for ploidy variation in *P. capsici*. After outlier removal, the  
163 final data set consisted of 159 field isolates, 41 *in vitro* F<sub>1</sub>, and three *in vitro* selfs.

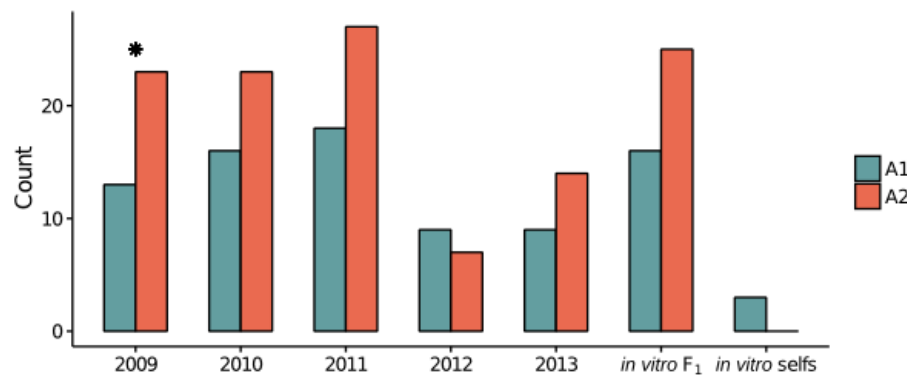

164

165 **Figure 1. Distribution of the mating type of each isolate by year in the final, clone-corrected**  
166 **data set.** Counts of the mating type of each isolate, A1 (teal) and A2 (reddish brown), in the *in*  
167 *vitro* F<sub>1</sub>, *in vitro* selfs, and clone-corrected field isolates, separated by year. The star indicates a  
168 significant difference ( $\chi^2$  test;  $P$ -value<0.1) between A1 and A2 counts.

169 Clones did not appear in multiple years, consistent with the inability of asexual  
170 propagules to survive the winter (Babadoost and Pavon, 2013; Hausbeck and Lamour, 2004).  
171 After clone-correction, the A2 mating type was more represented in the field (A1:A2=65:94;  $\chi^2$   
172 test,  $P$ -value=0.02), a phenomenon also observed in the *in vitro* F<sub>1</sub> (A1:A2=16:25;  $\chi^2$  test,  $P$ -  
173 value=0.16; Figure 1). The only exception was 2012, which may be explained by a smaller  
174 sample size in this year, artificially compounded by loss of several unique isolates (based on  
175 microsatellite profiles (Dunn et al., 2014) in culture prior to this study.) We observed lower  
176 genotypic diversity in 2012-13 (Supplementary Table S2), consistent with Dunn et al. (2014).

177 To reduce oversampling of specific genomic regions, which can disproportionately  
178 influence population genetic inference (Abdellaoui et al., 2013; Price et al., 2006), without  
179 making assumptions about linkage disequilibrium (LD), we randomly selected one SNP within a  
180 given, non-overlapping 1 kb window. With final quality filters, and including only SNPs in  
181 scaffolds containing at least 300 kb ( $n=63$ ), pruning resulted in a data set of 6,916 SNPs  
182 (Supplementary Figure S1). Bimodal heterozygosity and minor allele frequency (MAF)  
183 distributions in this reduced SNP set were consistent with distributions in the unpruned data set  
184 (Supplementary Figure S4). The pruned data set had a median SNP call rate of 98.01% and  
185 median site depth of 18.61 (i.e. average number of reads per individual per SNP). The median  
186 sample call rate (i.e. percentage of SNPs genotyped in each sample) was 97.77%, and the median  
187 sample depth (i.e. average number of reads per SNP per individual) was 20.36. Among technical  
188 replicates ( $n=4$ ) the error rate was on average 1.52%. We utilized the pruned data set for all  
189 subsequent analyses.

#### 190 **Population differentiation increases with year**

191 To broadly define genetic relationships between the *in vitro* and field isolates relative to  
192 the founding parents, we analyzed the field, *in vitro* and parents (represented by consensus  
193 parental genotypes, see Methods) jointly, with principal component analysis (PCA). The PCA  
194 exhibited the expected biparental population structure, in that the majority of isolates clustered in  
195 between the parental isolates along the major axis of variation, principal component (PC) 1  
196 (Figure 2A). Most 2009-11 isolates clustered with the *in vitro*  $F_1$ , whereas, many 2012-13  
197 isolates were dispersed along both axes, suggesting differentiation associated with year.

198 To explore structure exclusively within the field population, we performed PCA on only  
199 the field isolates. Along PC1, isolates from 2012-13 were differentiated from prior year isolates  
200 (Figure 2B). Whereas, PC2 described differentiation within and between years.

201 To assess the variance in allele frequencies between years, we estimated pairwise  $F_{ST}$   
202 (Weir and Cockerham, 1984) between years, where each year was defined as a distinct  
203 population. All pairwise comparisons were significantly greater than zero with the exception of  
204 2009 versus 2010. Small  $F_{ST}$  estimates for comparisons between 2009, 2010, 2011 and the *in*  
205 *vitro*  $F_1$  indicated minimal variation in allele frequencies between these years. The greatest  
206 differences were observed between years 2012 and 2013 compared to 2009, 2010 and the *in vitro*

207 F<sub>1</sub> populations (Figure 2C), consistent with the PCA results. In addition, years 2012 and 2013  
208 were also significantly differentiated from each other ( $F_{ST}=0.027$ ).

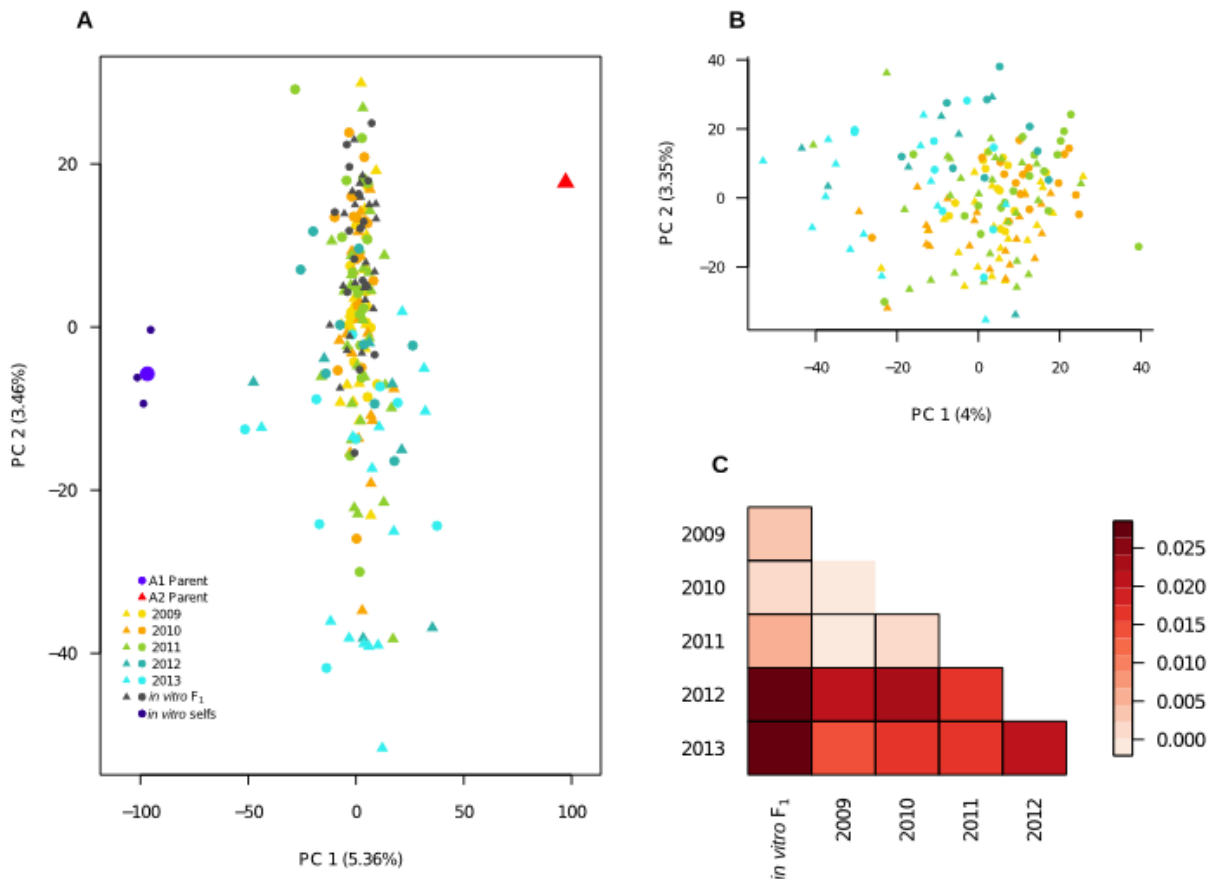

209

210 **Figure 2. Population structure in the biparental field population relative to the *in vitro* F<sub>1</sub>**  
211 **and founding parents.** (A) Field isolates, *in vitro* F<sub>1</sub>, *in vitro* selfs, and consensus parental  
212 genotypes plotted along the first two principal components (PCs). Each year is represented by a  
213 different color, with the A1 and A2 parental isolates indicated by blue and red, respectively.  
214 Shapes indicate the mating type of each isolate, with triangles (A1) and circles (A2). (B) A PCA  
215 of only the field isolates, with color and symbol scheme consistent with (A). (C) Pairwise  $F_{ST}$  for  
216 comparisons between sample years and the *in vitro* F<sub>1</sub> represented by a heat map, with more  
217 positive  $F_{ST}$  values increasingly red. A border indicates that the pairwise  $F_{ST}$  value was  
218 significantly different from 0, as tested by 1000 random SNP permutations.  
219



## 220 Inbreeding in the field population

221 To quantify changes in inbreeding in the closed, field population, we estimated the  
222 individual inbreeding coefficient ( $F$ ) for each isolate. While  $F$  does not directly measure identity-  
223 by-descent (IBD), it is highly correlated with IBD estimates in empirical and simulated data sets  
224 with relatively large numbers of markers (Kardos et al., 2015), particularly in highly subdivided,  
225 small populations (Balloux et al., 2004), such as the population under study. And, in a closed,  
226 biparental population, heterozygosity is directly proportional to the degree of inbreeding  
227 (Wright, 1921). Negative  $F$  estimates correspond to heterozygote excess relative to Hardy-  
228 Weinberg expectations for a reference population, defined here as the *in vitro*  $F_1$ . Positive  $F$   
229 values indicate heterozygote deficiency.

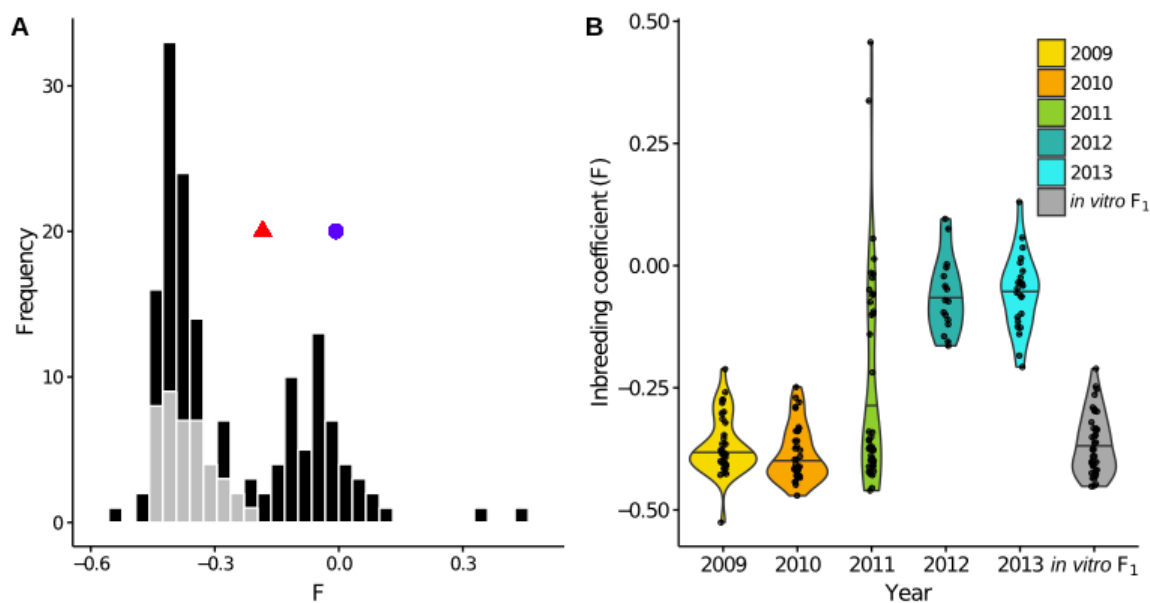

230  
231 **Figure 3. Generational shift in the field population.** (A) Superimposed histograms of the  
232 individual inbreeding coefficient ( $F$ ), estimated from 6,916 SNPs, in the *in vitro*  $F_1$  (gray) and  
233 field population (black). The *in vitro*  $F_1$  were more heterozygous than the founding parental  
234 isolates, corresponding to more negative  $F$  values, indicated by a blue circle (A1 parent) and red  
235 triangle (A2 parent). In contrast, the field population exhibited a bimodal  $F$  distribution. (B)  
236 Distributions of  $F$  by year represented by violin plots, with each year represented by a distinct  
237 color and individual data points overlaid. The long upper tail of the 2011 distribution is driven by  
238 two field selfs.  
239

240 First, to establish expectations for a known  $F_1$  population, we assessed the  $F$  distribution  
241 in the *in vitro*  $F_1$ . The *in vitro*  $F_1$ , with a mean  $F$  of -0.366, was more heterozygous than the  
242 founding parents (average  $F$  across replicates = -0.007 (A1) and -0.183 (A2); Figure 3A). In

243 contrast to the unimodal *in vitro* F<sub>1</sub>, the field population had a bimodal F distribution, with one  
244 peak approximately centered at the *in vitro* F<sub>1</sub> mean, and a second peak centered at a less  
245 negative F value. This second peak indicated that inbreeding was occurring in the field  
246 population.

247 To dissect the bimodal shape of the field distribution, we analyzed F for each year  
248 separately. Both for 2009 and 2010, the distributions were unimodal with F means not  
249 significantly different from the *in vitro* F<sub>1</sub> mean (pairwise t-test; *P*-values=1.0; Figure 3B). For  
250 years 2012 and 2013, distributions were also unimodal, but had F means significantly less  
251 negative than the *in vitro* F<sub>1</sub> (*P*-values<0.0001). Year 2011 had a bimodal F distribution.

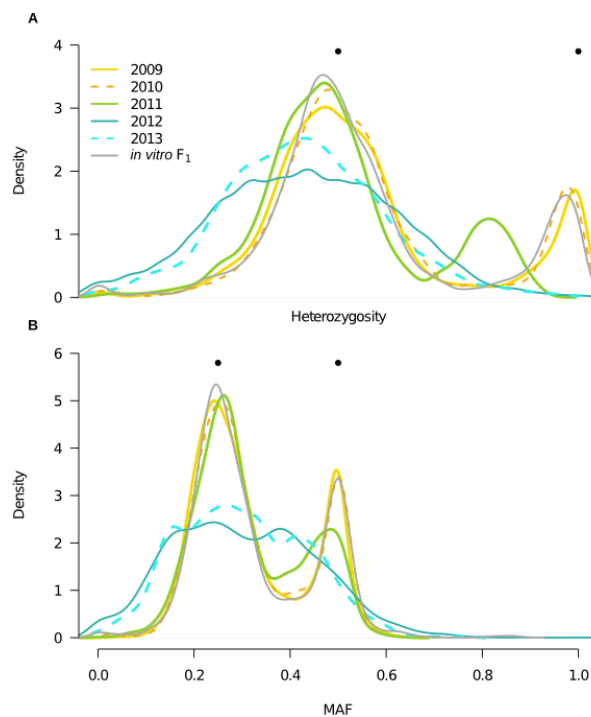

252

253 **Figure 4. Year heterozygosity and allele frequency (MAF) distributions.** Filled, black circles  
254 indicate expectations for population heterozygosity and MAF in a theoretical F<sub>1</sub> population. (A)  
255 Distributions of the proportion of heterozygous individuals per SNP (*n*=6,916) for each year and  
256 the *in vitro* F<sub>1</sub>, represented by kernel density estimates, with color corresponding to year.

257 Bimodal distributions in the *in vitro* F<sub>1</sub> and years 2009-10 are consistent with expectations for  
258 the F<sub>1</sub> generation, whereas unimodal distributions in 2012-13 indicate presence of inbreeding. A  
259 shift in the bimodal distribution of 2011, indicates the mixed outbred and inbred composition of  
260 this year. (B) MAF distributions, where the minor allele is defined based on the frequency in the  
261 total field population, for each year and the *in vitro* F<sub>1</sub>, with color designations the same as in  
262 (A).

263

264 To interpret the effect of changes in inbreeding on genotypic and allele frequencies with  
265 time, we analyzed both SNP heterozygosity and MAF distributions for each year. In a biparental  
266 cross, clear expectations for these quantities in the  $F_1$  generation makes them informative in  
267 distinguishing  $F_1$  from inbred generations. Specifically, in the  $F_1$  generation, sites should  
268 segregate with a MAF of either 0.25 (for a cross of  $Aa \times AA$ ) or 0.5 (for  $Aa \times Aa$  and  $AA \times aa$ ),  
269 and population heterozygosity should be 50% or 100% at each SNP. In the  $F_2$  generation, i.e. a  
270 population derived from a single generation of inbreeding, MAF should remain constant,  
271 whereas heterozygosity should decline. Our results showed that the *in vitro*  $F_1$ , 2009, and 2010  
272 behaved in accordance with expectations for a predicted  $F_1$ ; the heterozygosity distributions had  
273 peaks centered at approximately 50% and 100% (Figure 4A), and the MAF distributions had  
274 peaks at 0.25 and 0.5 (Figure 4B). In contrast, MAF and heterozygosity distributions in 2012 and  
275 2013 were not consistent with  $F_1$  expectations, in that we no longer observed obvious peaks  
276 (Figure 4). While genotypic frequency shifts in 2012 and 2013 indicated presence of inbreeding  
277 and deviation from  $F_1$  expectations, changes in the MAF distribution also denoted that these  
278 were likely not canonical  $F_2$  populations. Discrete generations are implicit in a  $F_2$ , therefore  
279 deviation from  $F_2$  expectations may be attributed to violation of this assumption.

280 Finally, in 2011, both heterozygosity and MAF distributions were bimodal, as in an  $F_1$ ,  
281 but with reduced heterozygosity and deviation in allele frequencies relative to the *in vitro*  $F_1$  and  
282 prior years (Figure 4). These shifts in 2011 suggested coexistence of both  $F_1$  and inbred isolates  
283 (i.e. non- $F_1$  isolates) in this year, consistent with the bimodal 2011 F distribution (Figure 3B).

#### 284 **Selfing in the laboratory and field**

285 In addition to quantifying inbreeding (defined as inter-mating between related isolates),  
286 we also estimated the incidence of self-fertilization in the biparental, field population. The  
287 frequency at which *P. capsici* reproduces through self-fertilization in either field or lab  
288 conditions is unknown (Dunn et al., 2014). Given the limited prior evidence of selfing in *P.*  
289 *capsici*, we first confirmed that the three putative *in vitro* selfs were indeed the product of self-  
290 fertilization by the A1 parent, as hypothesized by Dunn et al. (2014). To this end, we  
291 distinguished the *in vitro* selfs from the *in vitro*  $F_1$  by four features: 1) Clustered with the A1  
292 parent in PCA (dark blue circles in Figure 2A); 2) Alleles shared IBS disproportionately with the  
293 A1 versus A2 parent; 3) Heterozygosity approximately 50% of the A1 parent; and 4)

294 Significantly higher inbreeding coefficients relative to the  $F_1$  (>3 standard deviations (s.d.) from  
 295 the mean; Table 1).

296 Having shown that generalized expectations for selfing applied to *P. capsici*, we utilized  
 297 extreme heterozygote deficiency as an indicator of selfing in the field. As, in the field context,  
 298 the first three aforementioned selfing features were inapplicable because the progenitor of a  
 299 selfed isolate in the field was not *a priori* known. We observed that two of the 2011 field isolates  
 300 were F outliers (>3 s.d. from the mean) with respect to the inbred field contingent distribution  
 301 ( $\bar{x}=-0.050$ ,  $s=0.12$ ). We classified these two A1 field isolates as field selfs (Table 1). Lack of  
 302 disproportionate IBS of the field selfs with either founding parent denoted that these isolates  
 303 were not the product of self-fertilization by either founding parent. Therefore, we observed  
 304 selfing in the *in vitro* and field populations at frequencies of 3/46 (6.5%) and 2/159 (1.26%),  
 305 respectively, denoting minimal incidence of selfing in both lab and field scenarios.

306 **Table 1. Selfed isolates in the *in vitro* and biparental field populations in terms of**  
 307 **heterozygosity, Mendelian errors (MEs), and alleles shared identity-by-state (IBS) with**  
 308 **either founding parent**

| Statistic                              | Consensus parental |       | <i>in vitro</i> selfs |       |       | Putative field selfs |          |
|----------------------------------------|--------------------|-------|-----------------------|-------|-------|----------------------|----------|
|                                        | A1                 | A2    | 68 14                 | 68 19 | 68 27 | 11PF 21A             | 11PF 26A |
| Individual heterozygosity <sup>1</sup> | 0.41               | 0.48  | 0.25                  | 0.21  | 0.22  | 0.22                 | 0.27     |
| F <sup>2</sup>                         | -0.01              | -0.18 | 0.38                  | 0.48  | 0.46  | 0.46                 | 0.34     |
| MEs <sup>3</sup>                       | 0.19               | 0.19  | 0.25                  | 0.28  | 0.27  | 0.27                 | 0.21     |
| IBS with the A1 parent <sup>4</sup>    | 1.00               | 0.47  | 0.91                  | 0.89  | 0.90  | 0.65                 | 0.66     |
| IBS with the A2 parent <sup>4</sup>    | 0.47               | 1.00  | 0.45                  | 0.44  | 0.44  | 0.62                 | 0.65     |

<sup>1</sup> Proportion of heterozygote, non-missing sites per individual

<sup>2</sup> Individual inbreeding coefficient (F)

<sup>3</sup> Proportion of Mendelian errors (MEs) per individual (corrected for outlier SNPs), relative to the consensus parental genotypes

<sup>4</sup> Identity-by-state (IBS) of each isolate with the A1 or A2 parental consensus genotype

309

310

### 311 **Classifying $F_1$ versus inbred isolates in the field using Mendelian errors (MEs)**

312 Based on the above results, we hypothesized that 2009-10 were comprised of mainly  $F_1$ ,  
 313 2012-13 inbred, and 2011 a mixture of both  $F_1$  and inbred isolates. However, we had heretofore  
 314 not verified that each year was homogeneous with respect to  $F_1$  and inbred composition. To  
 315 quantify the number of  $F_1$  isolates, we used the fact that the genotypes of the founding parents  
 316 were known to calculate an additional individual summary statistic, the proportion of Mendelian  
 317 errors (MEs). A ME is defined as a genotype inconsistent with the individual being an  $F_1$  derived  
 318 from specific parents (Purcell et al., 2007), here, the A1 and A2 founders. Commonly, MEs have

319 been used to detect genotyping and experimental errors in SNP data sets where pedigree  
320 information is known (Purcell et al., 2007). The expectation is that a true  $F_1$  individual should  
321 have very few MEs, a postulate we applied to assess whether each field isolate belonged to the  $F_1$   
322 generation.

323 Initial ME estimates revealed both randomly distributed and clustered ME-enriched  
324 SNPs. In S1 Text, we show that clustered ME-enriched SNPs corresponded to inferred mitotic  
325 LOH events in the parental isolates in culture. After removing all ME-enriched SNPs ( $n=848$ ),  
326 mean MEs per isolate for the *in vitro*  $F_1$  and field  $F_1$  subpopulations were 1.38% and 0.98%,  
327 below our estimated genotyping error rate of approximately 1.5%.

328 Akin to  $F_1$ , the proportion MEs per individual is a function of genotypic frequencies.  
329 Therefore, it was not surprising that year distributions of the ME statistic were consistent with  $F_1$ ,  
330 with increased MEs in years 2012-13 (Figure 5A). Because asexual propagules do not survive  
331 the winter (Babadoost and Pavon, 2013; Hausbeck and Lamour, 2004), it can be assumed that all  
332  $F_1$  isolates in the field, in any year, were derived from oospores in the year of the initial field  
333 inoculation (2008). Applying a threshold of 5.58% MEs (3 s.d. from the *in vitro*  $F_1$  mean) to  
334 characterize  $F_1$  versus non- $F_1$ , we observed exclusively  $F_1$  in 2009-10, a mixture of  $F_1$  and inbred  
335 isolates in 2011 (ratio of  $F_1$  to inbred=29:16) and all inbred isolates in 2012-13 (Figure 5B). As  
336 such,  $F_1$  dominated in 2009-11, demonstrating that oospores were viable and pathogenic for at  
337 least three years.

338 When the inbred isolates were removed from the 2011 data, the MAF distribution for  
339 2011 was consistent with  $F_1$  expectations (Supplementary Figure S5). Concurrent observation of  
340 both  $F_1$  and inbred isolates in a single year (2011) provided direct evidence of overlapping  
341 generations in the field population, supporting overlapping generations as contributing to  
342 deviation from  $F_2$  expectations in the inbred 2012 and 2013 years.

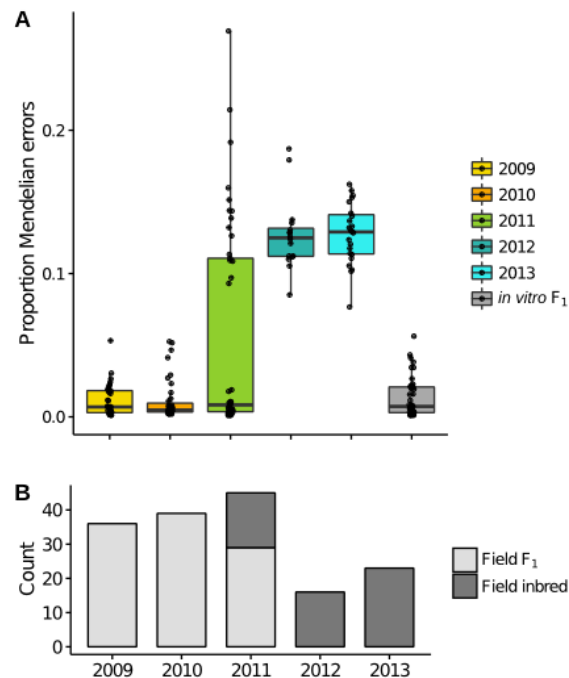

343

344 **Figure 5. Mendelian errors (MEs) distinguish F<sub>1</sub> and inbred isolates in the field.** (A)  
345 Boxplots of the proportion of MEs per individual for each year are consistent with the inbreeding  
346 coefficient trend, with a bimodal distribution in 2011, and increased MEs in later years. (B)  
347 Classification of each isolate based on the proportion of MEs, with counts of field F<sub>1</sub> (light gray)  
348 and field inbred (dark gray) for each sample year.

349

350 In addition, the ME estimates allowed us to pool isolates from separate years to define  
351 sub-populations, the field F<sub>1</sub> ( $n=104$ ) and the field inbred ( $n=53$ ; excluding the field selfs), for  
352 subsequent analyses. As in the total field population, A2 isolates were overrepresented in both  
353 the field F<sub>1</sub> and inbred subpopulations (A1:A2=43:61 and 21:32, respectively).

## 354 Regions of differentiation between generations in the field population

355 The generational transition in the field population from  $F_1$  to inbred was accompanied by  
 356 changes in the MAF distribution (Supplementary Figure S5), implying the biased transmission of  
 357 alleles to generations beyond the  $F_1$ . To identify which SNPs drove this allele frequency shift, we  
 358 performed a genome-wide Fisher's Exact test of allele frequency differences between the field  $F_1$   
 359 and field inbred subpopulations. We collectively analyzed these two subpopulations, rather than  
 360 compare allele frequencies between years, due to the presence of overlapping generations, which  
 361 complicate interpretation of temporal dynamics (Jorde and Ryman, 1995). From this analysis, we  
 362 observed several regions of differentiation between these subpopulations (Figure 6; see  
 363 Supplementary Table S5 for coordinates).

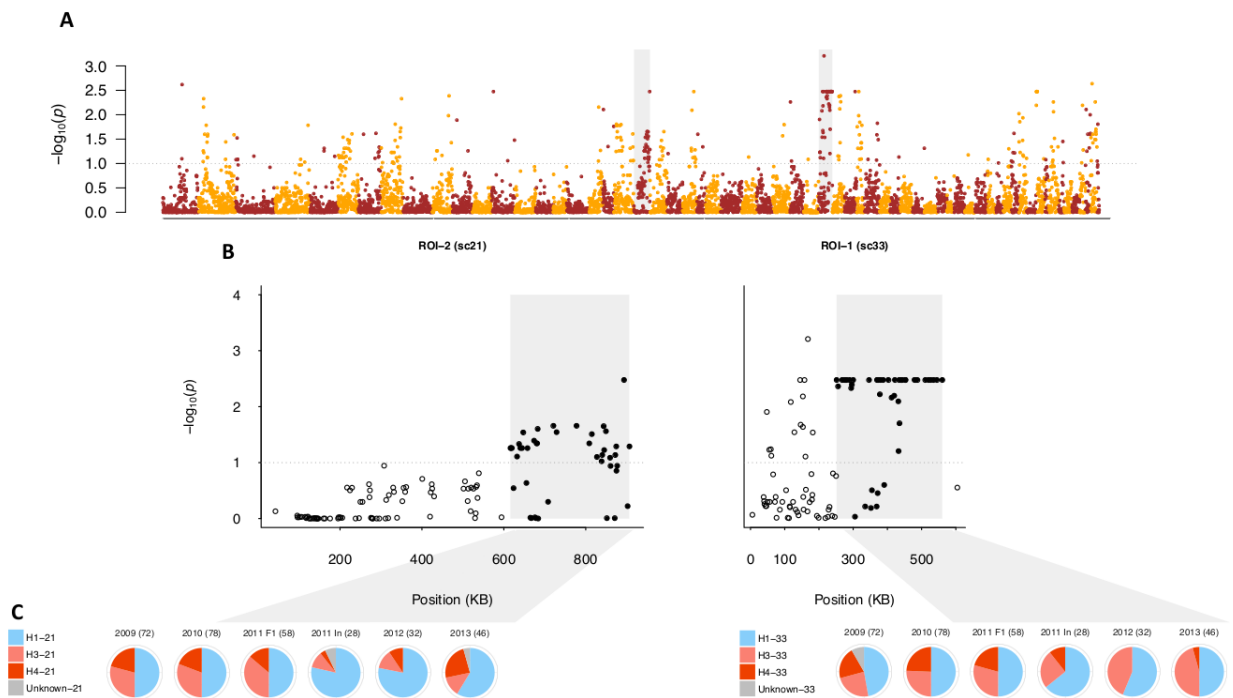

364

365 **Figure 6. Regions of differentiation between the field  $F_1$  and inbred subpopulations.** (A)  
 366 Negative  $\log_{10}$ -transformed, false-discovery rate (FDR) adjusted  $P$ -values from the genome-wide  
 367 test of allele frequency differences between the field  $F_1$  and inbred subpopulations, ordered by  
 368 physical position. The gray dotted lines in (A) and (B) indicate the significance threshold  
 369 ( $\alpha=0.10$ ). Color alternates by scaffold. The shaded gray boxes indicate the SNPs in scaffolds 21  
 370 and 33 corresponding to ROIs 2 and 1, respectively. (B) Same as (A) except that  $P$ -values are  
 371 shown only for scaffolds 21 and 33. Here, gray boxes denote the sub-region within each scaffold  
 372 defined as a ROI. Closed, black circles indicate SNPs within each ROI, whereas open, black  
 373 circles indicate SNPs outside of the ROI. (C) Pie charts represent the haplotype frequencies  
 374 found in each year (with 2011 separated into  $F_1$  and inbred (In) isolates), with the number of  
 375 sampled chromosomes noted for each year. Blue corresponds to the single A1 founding parental

376 haplotype, shades of red to the two A2 founding haplotypes, and gray to undesignated haplotypes  
377 in each ROI (see Methods).

378

379 First, we focused on the region with the most highly differentiated SNP, referred to as  
380 region of interest 1 (ROI-1; Figure 6B). Of the 94 SNPs spanned by ROI-1, 44% were among  
381 SNPs in the top 2% of loadings for PC1 in the field PCA, showing that this region was correlated  
382 with differentiation in the field population. To assess the relationship between allele frequency  
383 changes and parental haplotype frequencies, we locally phased all isolates using a deterministic  
384 approach (see Methods). Haplotypes in ROI-1 (H1a, H3a, and H4a) were defined based on the  
385 sub-region (251,367-560,094 bp) which contained the majority of significantly differentiated  
386 SNPs (44 out of 52 SNPs) and formed a LD block (Supplementary Figures S11 and S14).

387 Segregation among the  $F_1$  isolates in each year (2009 to 2011) followed the  $F_1$   
388 expectation of a 2:1:1 ratio of H1:H3:H4 haplotypes ( $\chi^2$  test;  $P$ -values=0.91, 0.99, 0.65,  
389 respectively). In contrast, in 2011 (inbred isolates only), 2012, and 2013, we observed lower  
390 frequencies of H4 and higher frequencies of H3 relative to the field  $F_1$  subpopulation (Figure  
391 6C). The decline in H4 frequency from 22.12% in the field  $F_1$  to 4.72% (and corresponding  
392 increases in H3 and H1) in the field inbred drove allele frequency changes in ROI-1  
393 (Supplementary Table S6). Because the H4 sequence was most distinct from the other  
394 haplotypes, the reduction in H4 frequency, along with inbreeding, resulted in declines in  
395 heterozygosity in ROI-1. Consistent reductions in H4 frequency among inbred isolates in 2011-  
396 13 compared to  $F_1$  isolates in prior years, provided strong evidence for the influence of selection.  
397 However, absence of H4 in year 2012 is very likely an artifact of smaller sample size in this year.

398 We next focused on a region in scaffold 21, defined as ROI-2, with the highest density of  
399 significantly differentiated SNPs (67%; Figure 6B). In ROI-2, as in ROI-1, only three haplotypes  
400 segregated in the field population (Supplementary Table S7). While not significant (at  $\alpha=0.05$ ),  
401 segregation among the  $F_1$  isolates in each year (2009 to 2011) deviated from the  $F_1$  expectation  
402 of a 2:1:1 ratio of H1:H3:H4 haplotypes ( $\chi^2$  test;  $P$ -values=0.61, 0.35, and 0.05, respectively),  
403 primarily attributed to higher H3 versus H4 haplotype frequency in the field  $F_1$  ( $\chi^2$  test;  $P$ -  
404 value<0.01). A decline in frequency of the A2 parent haplotype, H3, by 19.47% and an increase  
405 in the A1 parent haplotype, H1, by 19.81% drove allele frequency changes (Figure 6C and  
406 Supplementary Table S7). While the frequency of H3 and H4 oscillated among inbred isolates in  
407 2011-13, the H1 haplotype frequency was consistently higher than in the field  $F_1$ . In addition, we



408 observed a high frequency of homozygous H1 genotypes (53%), whereas the H3 and H4  
409 haplotypes were not observed in the homozygous state in the field inbred subpopulation, contrary  
410 to expectations (Supplementary Table S7).

411 To posteriorly assess the significance of changes in allele frequency in ROIs 1 and 2, we  
412 compared the median  $F_{ST}$  value for significantly differentiated SNPs in each of these regions to  
413 the genome-wide SNP  $F_{ST}$  distribution, where  $F_{ST}$  was defined as in (Lewontin and Krakauer,  
414 1973). Assuming that drift acts equally throughout the genome, extreme deviations in  $F_{ST}$   
415 provide evidence for selection (Lewontin and Krakauer, 1973). Median observed changes in  
416 allele frequency in ROIs 1 and 2 were in the in the 97<sup>th</sup> and 98<sup>th</sup> percentiles, respectively, relative  
417 to genome-wide  $F_{ST}$ , showing that allele frequency changes in these regions vastly exceeded the  
418 genome-wide average.

#### 419 **Heterozygosity declines are slower in the mating type region**

420 To investigate whether the mating system was a direct driver of differentiation in the field  
421 population, we first identified mating type associated SNPs using a Fisher's exact test of allele  
422 frequency differences between isolates of opposite mating types in the field  $F_1$  ( $n_{A1}=43$  and  
423  $n_{A2}=61$ ; Supplementary Figure S15). Most of the 184 significantly differentiated SNPs were in  
424 sub-regions of scaffolds 4 (37%) and 27 (43%), with additional differentiated SNPs in sub-  
425 regions of scaffolds 2, 34, and 40 (Figure 7 and Supplementary Table S8). All scaffolds  
426 containing significantly associated SNPs were in linkage group 10, consistent with a prior study  
427 (Lamour et al., 2012), and supporting presence of a single mating type determining region in *P.*  
428 *capsici*, as posited for *P. infestans* and *P. parasitica* (Fabritius and Judelson, 1997). SNPs in  
429 these five sub-regions comprised 20.29% of SNPs with elevated PC loadings (top 2%) in the  
430 PCA of only the field isolates, compared to 5.10% genome-wide, denoting that these SNPs were  
431 disproportionately correlated with differentiation in the field population.

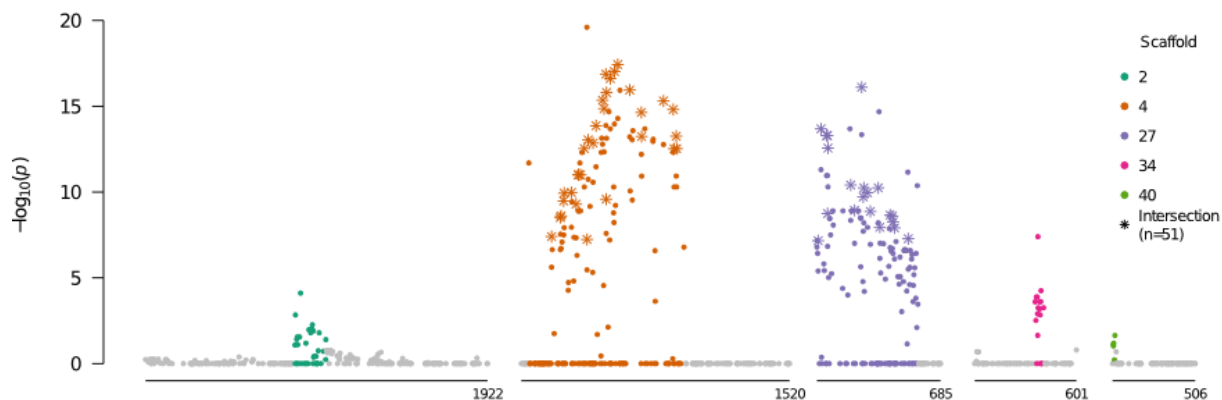

432

433 **Figure 7. Allele frequency differences between isolates of opposite mating types.** Negative  
434  $\log_{10}$ -transformed  $P$ -values, adjusted for multiple testing, from the Fisher's exact test of allele  
435 frequency differences between A1 and A2 isolates in the field  $F_1$ , plotted against physical  
436 position, for scaffolds with significantly differentiated regions (see Supplementary Table S8 for  
437 coordinates). Colored SNPs were within the bounds of the minimum and maximum significant  
438 SNPs in each scaffold containing at least two significantly associated SNPs within 200 kb. Stars  
439 indicate the SNPs which were significant in tests of allele frequency differences between mating  
440 types in both the field  $F_1$  and inbred subpopulations (Supplementary Text). All SNPs above the  
441 gray horizontal line were significant after the FDR correction ( $\alpha=0.1$ ).  
442

443 At 98.30% of the  $AA \times Aa$  SNPs associated with mating type in the field  $F_1$ , the A2 parent  
444 was heterozygous ( $Aa$ ) and the A1 parent was homozygous ( $AA$ ). As such, heterozygosity in the  
445 field progeny at these SNPs was attributed to inheritance of the minor allele ( $a$ ), descendent  
446 originally from the A2 parent. Therefore, segregation of the A2 but not A1 parental haplotypes  
447 was predominantly associated with mating type in the field  $F_1$ .

448 We defined the mating type region (MTR) as consisting of genomic tracts encompassed by  
449 the minimum and maximum significant SNPs in scaffolds 4 and 27, which comprised 1.42 of the  
450 1.64 Mb spanned by the five sub-regions, and contained 81% of the significantly differentiated  
451 SNPs. While we refer to a singular MTR, this was not intended to imply physical linkage  
452 between these two scaffolds. Based on the 293 SNPs in the MTR, the PCA of all isolates (*in*  
453 *vitro* and field;  $n=203$ ) showed incomplete differentiation according to mating type  
454 (Supplementary Figure S16).

455 To assess changes in heterozygosity in the MTR, we compared the heterozygosity  
456 distributions of the field  $F_1$  ( $n_{A1}=43$  and  $n_{A2}=61$ ) and inbred ( $n_{A1}=21$  and  $n_{A2}=32$ ) isolates in the  
457 MTR to the respective genome-wide distributions (see Methods). Observed heterozygosity in the

458 field  $F_1$  in the MTR was not centered at a significantly greater mean than the field  $F_1$  genome-  
459 wide distribution (one-sided Wilcoxon rank-sum test, all  $P$ -values $>0.87$ ; Supplementary Figure  
460 S17). In contrast, observed heterozygosity in the field inbreds in the MTR was shifted towards a  
461 greater mean relative to the field inbred genome-wide distribution (all  $P$ -values $<0.005$ ;  
462 Supplementary Figure S17). Therefore, in the field inbred subpopulation, heterozygosity declines  
463 were less appreciable in the MTR compared to the rest of the genome. In addition, we found that  
464 heterozygosity in the MTR was significantly higher than the rest of the genome for both the A1  
465 and A2 isolates in the field inbred subpopulation (all  $P$ -values $<10^{-4}$  and 0.003, respectively;  
466 Supplementary Figure S17), but not in the field  $F_1$  (all  $P$ -values $>0.99$  and 0.65, respectively;  
467 Supplementary Figure S17). Yet, heterozygosity in the MTR did not significantly exceed HWE  
468 expectations for A1 inbred isolates, as observed in the A2 inbred isolates, and both mating types  
469 in the field  $F_1$  (Supplementary Figure S18). These results were replicated when the A2 inbred  
470 isolates were down-sampled to the A1 inbred sample size (data not shown).

471 To further dissect the genetic dynamics of mating type in the field population, we tracked the  
472 allele frequencies of markers that were heterozygous in one parent and homozygous in the other  
473 parent ( $AA \times Aa$ ). These markers are particularly informative because the origin of the  $a$  allele  
474 can be unambiguously assigned to the heterozygous parent. Specifically, we calculated the  
475 frequency of the parental tagging allele ( $p_a$ ) in the parents, the field  $F_1$ , and the field inbreds at  
476 each of the  $AA \times Aa$  SNPs in the MTR ( $n_{AA \times Aa}=206$ ), for each mating type separately.

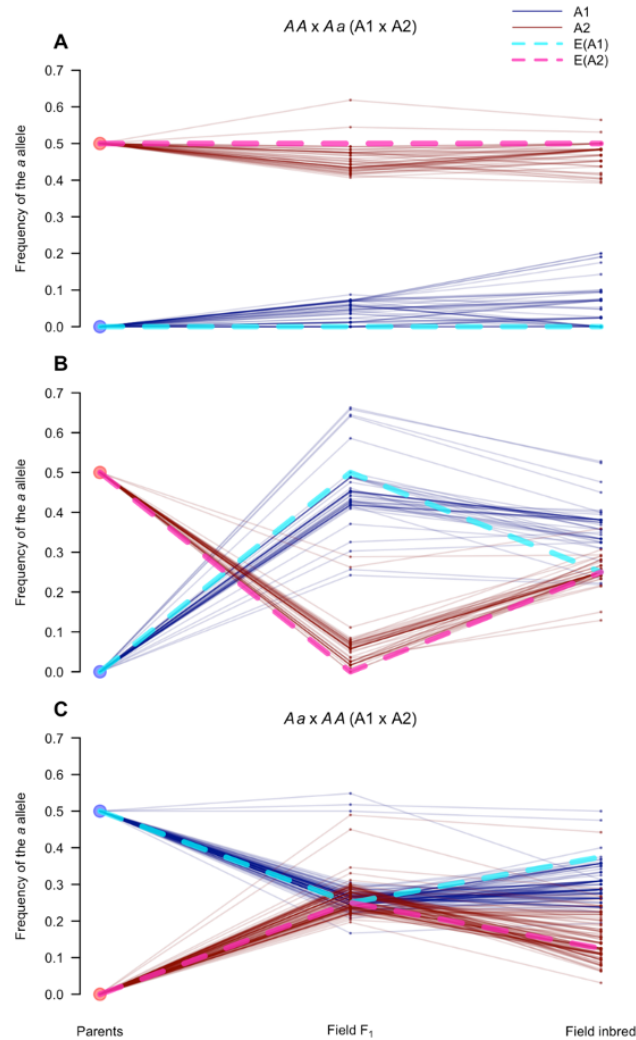

477

478 **Figure 8. Segregation of SNPs in the mating type region follow expectations for sex-linked**  
 479 **loci.** Frequency of the *a* allele ( $p_a$ ), for  $AA \times Aa$  and  $Aa \times AA$  ( $A1 \times A2$ ) markers in the mating  
 480 type associated sub-regions of scaffolds 4 and 27, defined as the mating type region (MTR).  
 481 Each parallel coordinate plot (A-C) tracks  $p_a$  at three time points (parents, field  $F_1$ , and field  
 482 inbred) in the A1 (blue solid lines) and A2 (red solid lines) isolates for: (A)  $AA \times Aa$  markers  
 483 ( $n=49$ ) with  $p_a > 0.3$  in the A2 and  $p_a < 0.3$  in the A1 field  $F_1$  isolates; (B) Remaining  $AA \times Aa$   
 484 markers ( $n=49$ ); and (C) All  $Aa \times AA$  markers. Expectations for sex-linked loci, indicated by  
 485 dotted lines, assuming the A1 and A2 mating types behave like the homogametic (light blue) and  
 486 heterogametic (pink) sexes, respectively, when: A) the *a* allele is in the A2 determining  
 487 haplotype (i.e. Y analog); B) the *a* allele is in the non-A2 determining haplotype (i.e. X analog);  
 488 and C) the *a* allele is in either of the non-A2 determining haplotypes (i.e. X analog).  
 489

490 For A2 tagging SNPs ( $n=98$ ), i.e. SNPs heterozygous in the A2 founding parent, we observed  
 491 two classes of markers: those with  $p_a$  of approximately 0.5 in the A2 and 0.0 in the A1 field  $F_1$   
 492 isolates, and the opposite scenario (Figure 8A-B; see Methods). In the first case ( $n=49$ ),  
 493 differences in  $p_a$  between mating types were maintained in the field inbred subpopulation (Figure

494 8A). Whereas, in the second case ( $n=49$ ), the difference in  $p_a$  between mating types narrowed  
495 (Figure 8B). In contrast to the A2 parent tagging SNPs, markers heterozygous in the A1 parent  
496 and homozygous in the A2 parent ( $n=108$ ) predominantly followed a single pattern (Figure 8C).  
497 These markers were at approximately equal allele frequencies in both mating types in the field  
498  $F_1$ , but slightly diverged in frequency in the field inbred subpopulation. These three distinct  
499 segregation patterns were consistent with the association of presence/absence (P/A) of one of the  
500 A2 founding haplotypes in association with mating type.

501 While the structural basis of mating type determination in *P. capsici* is not known,  
502 observed segregation patterns in the mating type region resemble those of an XY system, where  
503 P/A of the Y determines sex. Therefore, as frame of reference, we derived expectations for sex-  
504 linked loci in an XY system, i.e. loci conserved between both sex chromosomes (Allendorf et al.,  
505 1994; Clark, 1988), assuming that the A2 parent corresponded to the heterogametic sex. Using  
506 this model, expectations (blue and pink dotted lines in Figure 8) closely matched the observed  $p_a$   
507 trajectories in all three cases (A-C), further supporting the association of one of the A2  
508 haplotypes with mating type determination.

## 509 Discussion

510 To study the temporal genetic dynamics of *P. capsici* in response to a severe bottleneck,  
511 we SNP genotyped at high-density 232 isolates collected in years 2009-13 from a closed,  
512 biparental field population founded in 2008, in Geneva, NY (Dunn et al., 2014). This  
513 experimental population parallels the infection scenario of a natural *P. capsici* epidemic, where a  
514 limited number of pathogen strains are thought to found a subsequently isolated population  
515 (Dunn et al., 2014; Lamour et al., 2012). Using filtered GBS data, we identified 159 unique field  
516 isolates and obtained 6,916 high quality SNPs with high sequencing depth (~20X coverage), low  
517 missing data, and over 97% reproducibility of genotype calls, distributed throughout the genome.  
518 With these data, we assessed temporal heterozygosity and allele frequency changes in the  
519 biparental population, representing the only controlled, multi-year genomic field study of a plant  
520 pathogen to date.

521 With knowledge of the parental genotypes and assuming simple Mendelian inheritance,  
522 we developed a threshold to detect  $F_1$  field isolates based on the incidence of MEs in the *in vitro*  
523  $F_1$  progeny. Our results showed that both field and *in vitro*  $F_1$  progeny were characterized by  
524 individual heterozygosity in large excess of Hardy-Weinberg expectations, explained by the fact

525 these isolates were descendent from only two parents. With small numbers of parents, the  
526 probability of allele frequency differences between opposite sexes (here, mating types) increases,  
527 consequently resulting in deviation from HWE among the progeny (Balloux, 2004; Luikart and  
528 Cornuet, 1999; Pudovkin et al., 1996; Robertson, 1965).

529 Over time, the field population underwent a generational shift, transitioning from  $F_1$  in  
530 2009-10, to mixed generational in 2011, and ultimately all inbred in 2012-13. Presence of  
531 exclusively  $F_1$  in 2009 suggests that the vast majority of oospores formed in the founding year  
532 (2008) were  $F_1$ . As oospores require a dormancy period of approximately one month (Dunn et  
533 al., 2014; Sator and Butler, 1968), it is not surprising that there was insufficient time to produce  
534 multiple generations in the founding year. The presence of only  $F_1$  and no inbred isolates in  
535 2010, however, cannot be similarly explained. Rather, abundant sexual reproduction in the  
536 founding year, coupled with a lower rate in 2009, may have led to disproportionate presence of  
537  $F_1$  oospores (from 2008) surviving in the soil and germinating in 2010. Year 2011, where both  
538 inbred and  $F_1$  isolates were observed in the field, signified a generational shift in the population.  
539 The absence of  $F_1$  in the following years (2012-13) is consistent with previous reports of oospore  
540 declines in viability over time (Bowers, 1990), and negligible oospore survival after four years in  
541 field conditions (Babadoost and Pavon, 2013). While we did not quantify disease incidence in  
542 the field, observation of predominantly  $F_1$  isolates in 2010-11 suggests that highly productive  
543 years contributed disproportionately to population structure, in accordance with theoretical  
544 predictions for populations in which sexual propagules require a dormancy period, e.g. plant  
545 species with seed banks (Nunney, 2002; Templeton and Levin, 1979). As a consequence,  
546 heterozygosity did not immediately decline in the second year of the field population, similarly  
547 consistent with the delayed attainment of equilibrium genotypic frequencies attributed to seed  
548 bank dynamics (Templeton and Levin, 1979).

549 Approximate equilibrium genotypic frequencies were not observed in the field population  
550 until the fourth year (2012). Here, a single large increase in homozygosity in the total population  
551 was consistent with cycles of inbreeding beyond a theoretical  $F_2$  resulting in less appreciable  
552 declines in heterozygosity relative to the prior generation (Wright, 1921). However, two  
553 excessively homozygous field isolates, identified as field selfs, significantly deviated from this  
554 trend. Given this low frequency of selfing, we conclude that *P. capsici* behaved essentially as an  
555 obligate outcrossing species in the biparental field population. Occurrence of selfing in *P. capsici*

556 is consistent with a previous report of oospore induction when strains of opposite mating types  
557 were separated by a membrane (Uchida and Aragaki, 1980), but contradicts previous studies  
558 which found no evidence for self-fertilization under *in vitro* conditions (Hurtado-Gonzales and  
559 Lamour, 2009; Lamour et al., 2012). As a single generation of self-fertilization reduces  
560 heterozygosity by approximately 50% in the progeny, minimal incidence of selfing delayed  
561 heterozygosity declines in the field population, as described for hermaphroditic plant species  
562 (Balloux, 2004).

563 In addition, while we observed three A1 parental selfs among the 46 *in vitro* progeny, we  
564 did not observe selfs derived from either founding parent in the field, despite the larger field F<sub>1</sub>  
565 sample size. Field isolates were inherently selected for both viability and pathogenicity, as well  
566 as resilience to environmental factors, whereas, *in vitro* isolates were selected solely on viability  
567 in culture. Therefore, this result may reflect a fitness cost to self-fertilization, as observed in  
568 essentially all outcrossing species (Charlesworth and Charlesworth, 1987; Falconer and Mackay,  
569 1996), manifest to a greater extent in the field versus laboratory conditions.

570 Given the potential fitness cost to self-fertilization in *P. capsici*, an increase in inbreeding  
571 may explain the allele frequency changes which accompanied the transition from an F<sub>1</sub> to inbred  
572 population, as inbreeding presents recessive deleterious alleles in the homozygous state,  
573 rendering them subject to selection (Charlesworth, 2003; Kirkpatrick and Jarne, 2000).  
574 Simultaneously, inbreeding indirectly influences allele frequencies by decreasing the effective  
575 population size ( $N_e$ ) relative to the census population size, consequently amplifying the effects of  
576 genetic drift (Charlesworth, 2009). In addition to inbreeding, many other factors likely decreased  
577  $N_e$ , thereby increasing the influence of genetic drift: imbalanced sex (here, mating type) ratios  
578 (Charlesworth, 2009); clonal reproduction (Balloux et al., 2003); variation in reproductive  
579 success (Hartl and Clark, 2007); small population sizes (Hartl and Clark, 2007) suggested by  
580 lower genotypic diversity in 2012-13; and overlapping generations (Felsenstein, 1971).  
581 Conversely, minimal differentiation between 2009-11, denotes that oospore survival, in behaving  
582 like a seed bank, mitigates the aforementioned reductions in  $N_e$  by maintaining a reservoir of  
583 genetic variation in the soil (Hairston and De Stasio, 1988; Nunney, 2002; Templeton and Levin,  
584 1979; Waples, 2006).

585 In contrast to the general trends described above, we characterized two regions (ROI-1  
586 and ROI-2) that significantly deviated from the genome-wide distribution of allele frequency

587 differences (median allele frequency change in the 97 percentile or greater) between the field F<sub>1</sub>  
588 and inbred subpopulations. In these two regions, which presented only three segregating  
589 haplotypes, in contrast to the expected four, for heterozygous parents, we associated allele  
590 frequency changes with haplotype frequency shifts. Genetic drift may still explain these results,  
591 as drift has a larger effect in regions of low variation, i.e. with higher effective inbreeding  
592 coefficients corresponding to lower local N<sub>e</sub> (Charlesworth, 2009; 2003). However, extreme  
593 changes in allele frequency are also suggestive of natural selection (Galtier et al., 2000;  
594 Lewontin and Krakauer, 1973). Here, observation of corresponding haplotype frequency shifts is  
595 consistent with hitchhiking or background selection having a large effect in inbred populations  
596 (Charlesworth, 2003), particularly with only a few generations. Alternatively, mitotic LOH, a  
597 phenomenon reported in the present study (see Supplementary Text) and in numerous  
598 *Phytophthora* species (Chamnanpant et al., 2001; Grünwald et al., 2012; Kasuga et al., 2016;  
599 Lamour et al., 2012), may explain the observation of a disproportionate number of homozygous  
600 genotypes among inbred isolates in ROI-2. Evidence for mitotic LOH in numerous species, e.g.  
601 *Saccharomyces cerevisiae* (Magwene et al., 2011), *Candida albicans* (Forche et al., 2011), and  
602 the chytrid *Batrachochytrium dendrobatidis* (Rosenblum et al., 2013), supports the theoretical  
603 expectation that this process facilitates adaptation by interacting with selection to alter allele  
604 frequencies (Mandegar and Otto, 2007). Given the limited number of generations, we cannot  
605 unequivocally attribute these dramatic haplotype frequency shifts to selection. Furthermore,  
606 additional work is required to assess the role of these regions in pathogenicity and local  
607 adaptation.

608         While we observed a genome-wide increase in homozygosity in the field population due  
609 to inbreeding, reductions in heterozygosity in the identified mating type associated region were  
610 smaller relative to the genome for both A1 and A2 isolates. We show that this result is explained  
611 by persistent allele frequency differences between isolates of opposite mating types in the MTR.  
612 Maintenance of elevated heterozygosity in sex-linked regions has been attributed to differences  
613 in founding allele frequencies between sexes in several systems (Allendorf et al., 1994; Marshall  
614 et al., 2004; Waples, 2014). Further, AA x Aa SNPs associated with mating type in the field F<sub>1</sub>  
615 were predominantly heterozygous in the A2 parent, implying that one of the A2 founding  
616 haplotypes was associated with mating type determination. Consistent with this result,  
617 segregation patterns for SNPs in the MTR resembled the behavior of loci in the pseudoautosomal



618 (conserved) regions of heteromorphic sex chromosomes (e.g. XY or ZW; (Clark, 1988)), where  
619 the A2 parent corresponded to the heterogametic, male sex. These results suggest that in  
620 populations of *P. capsici* with few founders, heterozygosity in the MTR will be maintained  
621 despite inbreeding, proportional to LD between the mating type factor(s) and the rest of the  
622 genome.

623 These findings, which represent the first detailed genomic analysis of mating type in a  
624 *Phytophthora* species, are consistent with the existing models of heterozygosity versus  
625 homozygosity at a single locus as determinant of mating type (Fabritius and Judelson, 1997;  
626 Sansome, 1980). However, our analysis does not demonstrate that heterozygosity *per se* confers  
627 the A2 mating type, nor does our analysis preclude the presence of heteromorphic mating type  
628 chromosomes in *P. capsici*. We applied stringent SNP filters to obtain a high quality set of  
629 markers, likely discarding SNPs located in regions of structural variation (i.e. duplications,  
630 deletions, repeats). Indeed, early cytological work supports heterozygosity for a reciprocal  
631 translocation in association with mating type in *P. capsici* and numerous *Phytophthora* species,  
632 posited as a mechanism to suppress local recombination (Sansome, 1976). Given that  
633 chromosomal heteromorphism has arisen in diverse taxa as a consequence of suppressed  
634 recombination between sex-determining chromosomes (Bachtrog, 2013; Charlesworth, 2013),  
635 future studies will investigate the association of structural variation and recombination  
636 suppression with mating type determination in *P. capsici*.

## 637 **Materials and Methods**

### 638 **Isolate and DNA collection**

639 In 2008, a restricted access research field at Cornell University's New York Agricultural  
640 Experiment Station in Geneva NY, with no prior history of Phytophthora blight, was inoculated  
641 once with two NY isolates of *P. capsici*, 0664-1 (A1) and 06180-4 (A2), of opposite mating  
642 types, as described in Dunn et al (2014). From 2009-13, the field was planted with susceptible  
643 crop species, and each year the pathogen was isolated from infected plant material, and cultured  
644 on PARPH medium (Dunn et al., 2014). Once in pure culture, a single zoospore isolate was  
645 obtained (Dunn et al., 2014), and species identity was confirmed with PCR using species specific  
646 primers, as previously described (Dunn et al., 2010; Zhang et al., 2008).

647 Isolates collected in 2009-12 were obtained from storage; isolates from 2013 were unique  
648 to this study and were collected from infected pumpkin plants (variety Howden Biggie). Single

649 oospore progeny ( $n=46$ ) from an *in vitro* cross between the founding parents were obtained from  
650 storage (Dunn et al., 2014). To revive isolates from storage, several plugs from each storage tube  
651 were plated on PARPH media. After less than one week, actively growing cultures were  
652 transferred to new PARP or PARPH medium.

653 Mycelia were harvested for DNA extraction as previously described (Dunn et al., 2010),  
654 except that sterile 10% clarified V8 (CV8) broth (Skidmore et al., 1984) was used instead of  
655 sterile potato dextrose broth. For each isolate, mycelia were grown in Petri plates containing  
656 CV8 broth for less than 1 week, vacuum filtered, and 90-110 mg of tissue were placed in 2ml  
657 centrifuge tubes and stored at  $-80^{\circ}\text{C}$  until DNA extraction. DNA was extracted using the DNeasy  
658 Plant Mini kit (Qiagen, Valencia, CA) according to manufacturer's instructions, except that  
659 mycelial tissue was ground using sterile ball bearings and a TissueLyser (Qiagen, Valencia, CA)  
660 as previously described (Dunn et al., 2010).

661 Mating type was determined as previously described (Dunn et al., 2010). Briefly, each  
662 isolate was grown on separate unclarified V8 agar with known A1 and A2 isolates, respectively.  
663 After at least one week of growth, the plates were assessed microscopically for the presence of  
664 oospores. For each trial, the A1 and A2 tester isolates were grown in isolation and on the same  
665 plate as negative and positive controls, respectively. We obtained mating type designations for  
666 isolates from years 2009-12 and the *in vitro*  $F_1$  from (Dunn et al., 2014).

### 667 **Genotyping**

668 All DNA samples were submitted to the Institute of Genomic Diversity at Cornell  
669 University for 96-plex GBS (Elshire et al., 2011). In brief, each sample was digested with *ApeKI*,  
670 followed by adapter ligation, and samples were pooled prior to 100bp single-end sequencing  
671 with Illumina HiSeq 2000/2500 (Elshire et al., 2011). Sequence data for samples analyzed in this  
672 study are available at XXX (sftp site).

673 To validate experimental procedures, DNA samples from the parental isolates were  
674 included with each sequencing plate (except in one instance). The parental isolates were  
675 sequenced initially at a higher sequencing depth (12-plex). Genotypes were called for all isolates  
676 simultaneously using the TASSEL 3.0.173 pipeline (Glaubitz et al., 2014). This process involves  
677 aligning unique reads, trimmed to 64bp, to the reference genome (Lamour et al., 2012) and  
678 mitochondrial (courtesy of Martin, F., USDA-ARS) assemblies, and associating sequence reads  
679 with the corresponding individual by barcode identification to call SNPs (Glaubitz et al., 2014).

680 The Burrows-Wheeler alignment (v.0.7.8) algorithm bwa-aln with default parameters (Li and  
681 Durbin, 2009) was used to align sequence tags to the reference genome (Lamour et al., 2012). To  
682 reduce downstream SNP artifacts due to poor sequencing alignment, reads with a mapping  
683 quality <30 were removed. Default parameters were otherwise used in TASSEL, with two  
684 exceptions: 1) Only sequence tags present >10 times were used to call SNPs; and 2) SNPs were  
685 output in variant call format (VCF), with up to 4 alleles retained per locus, using the  
686 `tbt2vcfplugin`. Genotypes were assigned and genotype likelihoods were calculated as described  
687 in (Hyma et al., 2015).

### 688 **Individual and SNP Quality Control**

689 Individuals with more than 40% missing data were removed from analysis. To mitigate  
690 heterozygote undercalling due to low sequence coverage, genotypes with read depth <5 were set  
691 to missing using a custom python script (available upon request). Subsequently, we utilized  
692 VCFtools version 1.14 (Danecek et al., 2011) to retain SNPs which met the following criteria: 1)  
693 Genomic; 2) <20% missing data; 3) Mean read depth  $\geq 10$ ; 4) Mean read depth <50; 5) Bi-allelic;  
694 and 6) Minor allele frequency (MAF)  $\geq 0.05$ . Additionally, indels were removed.

695 To remove isolates with likely ploidy variation, we assessed allele depth ratios for each  
696 isolate, where the allele depth ratio was defined as the ratio of the major allele to the total allele  
697 depth at a heterozygous locus (Li et al., 2015; Rosenblum et al., 2013; Yoshida et al., 2013).  
698 Allele depths were extracted from the VCF file, using a custom python script (available upon  
699 request) to analyze the distribution of allele depth ratios for each individual across all SNPs.

700 Post clone-correction (see below) and outlier removal, SNPs were further filtered as  
701 follows. SNPs with heterozygosity rates >90% among all isolates (clone-corrected and parental  
702 replicates) were removed and/or average allele depth ratios <0.2 or >0.8. Only SNPs within  
703 scaffolds containing more than 300 kb of sequence, covering ~48 Mb (~75% of the sequenced  
704 genome), were retained. We defined the minor allele as the least frequent allele in the clone-  
705 corrected field population.

706 Multiple sequencing runs of the parental isolates were used to define consensus  
707 genotypes for each parent using the majority rule. Sites where  $\geq 50\%$  of calls were missing or  
708 where disparate genotype calls were equally frequent were set to missing.

709 All filtering and analyses, if not otherwise specified, were performed in R version 3.2.3  
710 (R Core Team, 2015) using custom scripts (available upon request).

## 711 **Identifying a clone-correction threshold**

712 To establish a maximum similarity threshold to define unique genotypes, the genetic  
713 similarity of all sequencing runs of the parental isolates were compared. Similarity was defined  
714 as identity-by-state (IBS), the proportion of alleles shared between two isolates at non-missing  
715 SNPs. Parental replicates represented both biological (different mycelial harvests and/or  
716 independent cultures) and technical replicates (same DNA sample), thereby capturing variation  
717 associated with culture transfers, mycelial harvests, DNA extractions and sequencing runs  
718 (Supplementary Table S1). Based on the variation between parental replicates, individuals more  
719 than 95% similar to each other were considered clones, and one randomly selected individual  
720 from each clonal group was retained in the clone-corrected data set.

## 721 **Population Structure**

722 Principal component analysis was performed on a scaled and centered genotype matrix in  
723 the R package *pcaMethods* (Stacklies et al., 2007), using the *nipalsPCA* method to account for  
724 the small amount of missing data (method='nipals', center=TRUE, scale='uv'). This method was  
725 used for all PCAs performed. To estimate pairwise differentiation between years, we used Weir  
726 and Cockerham's (1984)  $F_{ST}$  measure (Weir and Cockerham, 1984), which weights allele  
727 frequency and variance estimates by population size, implemented in the R package *StAMMP*  
728 with the *stamppFST* function (Pembleton et al., 2013). We performed 1000 permutations of the  
729 SNP set to assess if  $F_{ST}$  estimates were significantly greater than zero (Pembleton et al., 2013;  
730 Weir and Cockerham, 1984).

## 731 **Measures of inbreeding**

732 We used the canonical method-of-moments estimator of the individual inbreeding  
733 coefficient,  $F=1-H_o/H_e$ , where  $H_o$  is the observed individual heterozygosity, and  $H_e$  is the  
734 expected heterozygosity given allele frequencies in a reference population assumed to be at  
735 HWE (Keller et al., 2011; Purcell et al., 2007). We utilized allele frequencies in the *in vitro*  $F_1$  to  
736 define expected heterozygosity, a theoretical equivalent to evaluating  $F$  with respect to the  
737 parental allele frequencies (Wang, 2014). For each isolate,  $F$  was calculated with respect to non-  
738 missing genotypes only. To compare average  $F$  between years, a pairwise t-test was implemented  
739 in R with *pairwise.t.test* (pool.sd=FALSE, paired=FALSE, p.adjust.method='bonferroni').

740 Heterozygosity was defined as the number of isolates with a heterozygous genotype at  
741 each SNP divided by the total number of non-missing genotype calls. Minor allele frequency

742 (MAF) was defined as the number of minor alleles, where the minor allele was defined as the  
743 allele with the lowest frequency in the field population, present at each SNP divided by the total  
744 number of non-missing chromosomes (number of non-missing genotype calls multiplied by two).  
745 Heterozygosity and MAF distributions for each year and the *in vitro* F<sub>1</sub> were graphically assessed  
746 using the *density* function in R.

747 For each individual, we calculated the proportion of MEs, defined as the ratio of MEs to  
748 the total number of non-missing tested sites, analogous to the PLINK implementation (`-mendel`)  
749 (Purcell et al., 2007). An ME was defined as a genotype inconsistent with the individual being an  
750 F<sub>1</sub> derived from the two founding parental isolates (Purcell et al., 2007). An isolate with a  
751 proportion MEs exceeding the *in vitro* F<sub>1</sub> mean by 3 s.d. was classified as field inbred and  
752 otherwise as field F<sub>1</sub>.

### 753 **Genome scan for allele frequency differentiation**

754 To detect regions of differentiation between the *in vitro* F<sub>1</sub>, field F<sub>1</sub>, and inbred isolates,  
755 we performed a Fisher's exact test of allele counts for all pairwise comparisons, using the  
756 *fisher.test* function in R. *P*-values were adjusted for multiple testing using the Benjamini and  
757 Hochberg (1995) procedure, implemented with the *p.adjust* function, at a false discovery rate  
758 (FDR) of 10% (Benjamini and Hochberg, 1995; Wright, 1992). Significant SNPs were retained  
759 in further analyses only if another SNP within 200 kb also surpassed the significance threshold.

760 We compared the F<sub>ST</sub> distribution of significantly differentiated SNPs within ROIs to the  
761 genome-wide F<sub>ST</sub> distribution according to Lewontin and Krakauer (1973). Here, F<sub>ST</sub> was  
762 defined as,  $F_{ST} = \frac{(\Delta p)^2}{p_0(1-p_0)}$ , where *p*<sub>0</sub> is the frequency of the minor allele in the field F<sub>1</sub>, and Δ*p*  
763 is the difference in allele frequency between the field F<sub>1</sub> and field inbred subpopulations.

764 Haploview (Barrett et al., 2005) was used to estimate pairwise LD (*r*<sup>2</sup>) between SNPs in  
765 scaffolds containing ROIs.

### 766 **Haplotyping**

767 As the population was established by two parental strains, assuming no mutation, all  
768 isolates were by definition combinations of the founding parental haplotypes. Therefore, we took  
769 a deterministic approach to phasing, akin to utilizing trio information to phase parental genotypes  
770 (Browning and Browning, 2011). Haplotyping in regions of interest was further facilitated by the  
771 fact that either or both parents were homozygous, with the homozygous genotype assumed to  
772 represent a founding parental haplotype. We showed that this was a valid assumption by

773 analyzing early replicates of the parental genotypes that represented the “ancestral” heterozygous  
774 genotype in a specific region (Supplementary Figure S13) and by comparison to homozygous  
775 genotypes of selfed isolates (data not shown). We used the homozygous parental stretches  
776 (haplotypes) to deduce the other haplotypes from consensus genotypes for the expected  
777 genotypic classes. Progeny membership in a genotypic class was defined by *k*-means clustering  
778 using the *kmeans* function in R (centers=8, n.iter=1000, nstart=100). To further refine clusters  
779 and remove recombinant isolates, we calculated local pairwise relatedness, defined as IBS,  
780 between isolates within a cluster, and removed isolates that shared on average less than 90% IBS  
781 with the respective cluster members. Next, we defined the consensus genotype based on the  
782 refined clusters utilizing the majority rule (see “Identifying a clone-correction threshold”), and  
783 heterozygous genotypes within haplotypes were set to missing.

784 To determine the haplotype composition of each isolate, the three identified haplotypes in  
785 a region of interest were used to construct reference genotypes for all possible haplotype  
786 combinations (e.g. H1/H2, H1/H1). Then, the genotypic discordance (i.e. the number of  
787 mismatched genotypes) between each isolate genotype and reference genotype were calculated.  
788 The most similar reference genotype was assigned if genotypic discordance was less than 25%.  
789 Otherwise, the isolate genotype was deemed “Unknown.”

790 To create phase diagrams, haplotype tagging SNPs (SNPs which unambiguously  
791 distinguished a specific haplotype) were identified at SNPs where all haplotypes had no missing  
792 data. Individual genotypes were then classified for homozygosity or heterozygosity at each  
793 haplotype tagging SNP.

#### 794 **Identifying mating type associated SNPs**

795 We performed a Fisher’s exact test of allele frequency differences between isolates of  
796 opposite mating types in the field  $F_1$ . Multiple test correction was performed as above (see  
797 ‘Genome scan for allele frequency differentiation’).

#### 798 **Heterozygosity in the MTR**

799 To test differences between the heterozygote frequency distribution in the mating type  
800 region relative to the rest of the genome, we compared the heterozygosity of genome-wide SNPs  
801 sampled in equal proportions of marker types (e.g.  $AA \times Aa$ ) to the mating type region using the  
802 *sample* function in R without replacement (replace=FALSE), excluding SNPs not polymorphic  
803 or with missing data in the parental isolates. The identified ME-enriched SNPs were excluded

804 (see Supplementary Text). To account for an unequal ratio of A1 to A2 mating type isolates, in  
805 each test, the A2s were down-sampled (without replacement) to equate with the A1 sample size  
806 in the respective subpopulation. We used the *wilcox.test* function in R to perform a one-sided,  
807 unpaired Wilcoxon rank sum test (alternative='less', paired=FALSE), repeated for 100 random  
808 SNP samples. Additionally, heterozygosity distributions of the A1 and A2 isolates in each  
809 subpopulation were compared to the respective genome-wide distribution, with SNP but not  
810 isolate down-sampling.

811 Heterozygote excess was tested at each locus in the A1 and A2 isolates for each  
812 subpopulation, using the function *HWExact* in the R package HardyWeinberg (Graffelman,  
813 2015; Wigginton et al., 2005). This amounts to a one-sided test of HWE where heterozygote  
814 excess is the only evidence of deviation from HWE. We controlled for multiple testing as above.

### 815 **Allele frequency changes in the MTR**

816 In the MTR, the frequency of the parental tagging allele ( $p_a$ ) at SNPs heterozygous in one  
817 parent and homozygous in the other, was calculated for A1 and A2 isolates separately in the  
818 parental generation, the field F<sub>1</sub> and the field inbreds, excluding missing genotypes. The A2  
819 tagging SNPs were separated into two categories based on  $p_a$  with respect to mating type in the  
820 field F<sub>1</sub>. The first case consisted of SNPs with  $p_a \geq 0.3$  in the A2 isolates and  $p_a \leq 0.3$  in the A1  
821 isolates, and the second case consisted of the remaining SNPs. Expectations for  $p_a$  in theoretical  
822 F<sub>1</sub> and F<sub>2</sub> populations, for the three cases where the *a* alleles is in the haplotype background of  
823 the: 1) Y in the male sex; 2) X in the male sex; and 3) X in the female sex, were derived based on  
824 the formulas in (Allendorf et al., 1994; Clark, 1988).

### 825 **Acknowledgements**

826 We thank Daniel C. Ilut and Amara R. Dunn for helpful conversations. We thank Holly W.  
827 Lange and Michael R. Fulcher for assistance with field and lab work. This work was supported  
828 by the New York State Department of Agriculture and Markets (grant numbers C200780,  
829 C200818 to C.D.S.). This work was also partly funded by USDA-NIFA/DOE Biomass Research  
830 and Development Initiative (BRDI) (grant number 2011-06476 to M.A.G.) and Cornell  
831 University startup funds to M.A.G.

### 833 **Author Contributions**

834 CDS and MOC conceived the experimental design; MOC, CDS, EG, and MAG conceptualized  
835 the analysis; MOC performed the experiments and analyses; MOC and EG wrote the manuscript;  
836 CDS and MAG revised the manuscript.

### 838 **References**

- 839 Abdellaoui, A., Hottenga, J. J., de Knijff, P., Nivard, M. G., Xiao, X., Scheet, P., et al. (2013).  
840 Population structure, migration, and diversifying selection in the Netherlands. *European*  
841 *Journal of Human Genetics* 21, 1277–1285. doi:10.1038/ejhg.2013.48.
- 842 Allendorf, F. W., Gellman, W. A., and Thorgaard, G. H. (1994). Sex-linkage of two enzyme loci  
843 in *Oncorhynchus mykiss* (rainbow trout). *Heredity* 72, 498–507.
- 844 Babadoost, M., and Pavon, C. (2013). Survival of Oospores of *Phytophthora capsici* in Soil.  
845 *Plant Dis.* 97, 1478–1483. doi:10.1094/pdis-12-12-1123-re.
- 846 Bachtrog, D. (2013). Y-chromosome evolution: emerging insights into processes of Y-  
847 chromosome degeneration. *Nat Rev Genet* 14, 113–124. doi:10.1038/nrg3366.
- 848 Balloux, F. (2004). Heterozygote excess in small populations and the heterozygote-excess  
849 effective population size. *Evolution* 58, 1891–1900. doi:10.1554/03-692.
- 850 Balloux, F., Amos, W., and Coulson, T. (2004). Does heterozygosity estimate inbreeding in real  
851 populations? *Molecular Ecology* 13, 3021–3031. doi:10.1111/j.1365-294X.2004.02318.x.
- 852 Balloux, F., Lehmann, L., and de Meeûs, T. (2003). The population genetics of clonal and  
853 partially clonal diploids. *Genetics* 164, 1635–1644.
- 854 Barrett, J. C., Fry, B., Maller, J., and Daly, M. J. (2005). Haploview: analysis and visualization  
855 of LD and haplotype maps. *Bioinformatics* 21, 263–265. doi:10.1093/bioinformatics/bth457.
- 856 Benjamini, Y., and Hochberg, Y. (1995). Controlling the false discovery rate: a practical and  
857 powerful approach to multiple testing. *Journal of the Royal Statistical Society Series B*  
858 *(Methodological)* 57, 289–300. doi:10.2307/2346101.
- 859 Bowers, J. H. (1990). Effect of Soil Temperature and Soil-Water Matric Potential on the Survival  
860 of *Phytophthora capsici* in Natural Soil. *Plant Dis.* 74, 771. doi:10.1094/PD-74-0771.
- 861 Browning, S. R., and Browning, B. L. (2011). Haplotype phasing: existing methods and new  
862 developments. *Nat Rev Genet* 12, 703–714. doi:10.1038/nrg3054.
- 863 Chamnanpant, J., Shan, W. X., and Tyler, B. M. (2001). High frequency mitotic gene conversion  
864 in genetic hybrids of the oomycete *Phytophthora sojae*. *Proc Natl Acad Sci USA* 98, 14530–  
865 14535. doi:10.1073/pnas.251464498.
- 866 Charlesworth, B. (2009). Fundamental concepts in genetics: Effective population size and  
867 patterns of molecular evolution and variation. *Nat Rev Genet* 10, 195–205.  
868 doi:10.1038/nrg2526.
- 869 Charlesworth, B., and Charlesworth, D. (1987). Inbreeding Depression and its Evolutionary  
870 Consequences. *Annual Review of Ecology and Systematics* 18, 237–268.  
871 doi:10.1146/annurev.ecolsys.18.1.237.
- 872 Charlesworth, D. (2003). Effects of inbreeding on the genetic diversity of populations.



- 873 *Philosophical Transactions of the Royal Society B: Biological Sciences* 358, 1051–1070.  
874 doi:10.1098/rstb.2003.1296.
- 875 Charlesworth, D. (2013). Plant sex chromosome evolution. *Journal of Experimental Botany* 64,  
876 405–420. doi:10.1093/jxb/ers322.
- 877 Clark, A. G. (1988). The evolution of the Y chromosome with X-Y recombination. *Genetics* 119,  
878 711–720.
- 879 Danecek, P., Auton, A., Abecasis, G., Albers, C. A., Banks, E., DePristo, M. A., et al. (2011).  
880 The variant call format and VCFtools. *Bioinformatics* 27, 2156–2158.  
881 doi:10.1093/bioinformatics/btr330.
- 882 Dunn, A. R., Bruening, S. R., Grünwald, N. J., and Smart, C. D. (2014). Evolution of an  
883 Experimental Population of *Phytophthora capsici* in the Field. *Phytopathology* 104, 1107–  
884 1117. doi:10.1094/PHYTO-12-13-0346-R.
- 885 Dunn, A. R., Milgroom, M. G., Meitz, J. C., McLeod, A., Fry, W. E., McGrath, M. T., et al.  
886 (2010). Population Structure and Resistance to Mefenoxam of *Phytophthora capsici* in New  
887 York State. *Plant Dis.* 94, 1461–1468. doi:10.1094/pdis-03-10-0221.
- 888 Elshire, R. J., Glaubitz, J. C., Sun, Q., Poland, J. A., Kawamoto, K., Buckler, E. S., et al. (2011).  
889 A robust, simple genotyping-by-sequencing (GBS) approach for high diversity species. *PLoS*  
890 *ONE* 6, e19379. doi:10.1371/journal.pone.0019379.
- 891 Erwin, D. C., and Ribeiro, O. K. (1996). *Phytophthora Diseases Worldwide*. St Paul, MN: The  
892 American Phytopathological Society.
- 893 Fabritius, A. L., and Judelson, H. S. (1997). Mating-type loci segregate aberrantly in  
894 *Phytophthora infestans* but normally in *Phytophthora parasitica*: implications for models of  
895 mating-type determination. *Curr. Genet.* 32, 60–65.
- 896 Falconer, D. S., and Mackay, T. F. C. (1996). *Introduction to Quantitative Genetics*. 4 ed. Burnt  
897 Mill, Harlow, Essex, England: Longman.
- 898 Felsenstein, J. (1971). Inbreeding and variance effective numbers in populations with  
899 overlapping generations. *Genetics* 68, 581–597.
- 900 Forche, A., Abbey, D., Pisithkul, T., Weinzierl, M. A., Ringstrom, T., Bruck, D., et al. (2011).  
901 Stress Alters Rates and Types of Loss of Heterozygosity in *Candida albicans*. *mBio* 2,  
902 e00129–11. doi:10.1128/mBio.00129-11.
- 903 Galtier, N., Depaulis, F., and Barton, N. H. (2000). Detecting bottlenecks and selective sweeps  
904 from DNA sequence polymorphism. *Genetics* 155, 981–987.
- 905 Glaubitz, J. C., Casstevens, T. M., Lu, F., Harriman, J., Elshire, R. J., Sun, Q., et al. (2014).  
906 TASSEL-GBS: a high capacity genotyping by sequencing analysis pipeline. *PLoS ONE* 9,  
907 e90346. doi:10.1371/journal.pone.0090346.

- 908 Graffelman, J. (2015). Exploring Diallelic Genetic Markers: The Hardy Weinberg Package.  
909 *Journal of Statistical Software* 64. doi:10.18637/jss.v064.i03.
- 910 Granke, L. L., Quesada-Ocampo, L., and Lamour, K. (2012). Advances in research on  
911 *Phytophthora capsici* on vegetable crops in the United States. *Plant Dis.* 96, 1588–1600.  
912 doi:10.1094/pdis-02-12-0211-fe.
- 913 Granke, L. L., Windstam, S. T., Hoch, H. C., Smart, C. D., and Hausbeck, M. K. (2009).  
914 Dispersal and movement mechanisms of *Phytophthora capsici* sporangia. *Phytopathology*  
915 99, 1258–1264. doi:10.1094/PHYTO-99-11-1258.
- 916 Grünwald, N. J., Garbelotto, M., Goss, E. M., Heungens, K., and Prospero, S. (2012). Emergence  
917 of the sudden oak death pathogen *Phytophthora ramorum*. *Trends in Microbiology* 20, 131–  
918 138. doi:10.1016/j.tim.2011.12.006.
- 919 Grünwald, N. J., Goodwin, S. B., Milgroom, M. G., and Fry, W. E. (2003). Analysis of  
920 genotypic diversity data for populations of microorganisms. *Phytopathology* 93, 738–746.  
921 doi:10.1094/PHYTO.2003.93.6.738.
- 922 Hairston, N. G., Jr, and De Stasio, B. T., Jr (1988). Rate of evolution slowed by a dormant  
923 propagule pool. *Nature* 336, 239–242. doi:10.1038/336239a0.
- 924 Hartl, D. L., and Clark, A. G. (2007). *Principles of Population Genetics*. Sunderland, MA:  
925 Sinauer Associates, Inc. Publishers.
- 926 Hausbeck, M. K., and Lamour, K. H. (2004). *Phytophthora capsici* on vegetable crops: research  
927 progress and management challenges. *Plant Dis.* 88, 1292–1303.  
928 doi:10.1094/PDIS.2004.88.12.1292.
- 929 Hurtado-Gonzales, O. P., and Lamour, K. H. (2009). Evidence for inbreeding and apomixis in  
930 close crosses of *Phytophthora capsici*. *Plant Pathology* 58, 715–722. doi:10.1111/j.1365-  
931 3059.2009.02059.x.
- 932 Hyma, K. E., Barba, P., Wang, M., Londo, J. P., Acharya, C. B., Mitchell, S. E., et al. (2015).  
933 Heterozygous Mapping Strategy (HetMappS) for High Resolution Genotyping-By-  
934 Sequencing Markers: A Case Study in Grapevine. *PLoS ONE* 10, e0134880–31.  
935 doi:10.1371/journal.pone.0134880.
- 936 Jorde, P. E., and Ryman, N. (1995). Temporal allele frequency change and estimation of  
937 effective size in populations with overlapping generations. *Genetics* 139, 1077–1090.
- 938 Kardos, M., Luikart, G., and Allendorf, F. W. (2015). Measuring individual inbreeding in the age  
939 of genomics: marker-based measures are better than pedigrees. *Heredity* 115, 63–72.  
940 doi:10.1038/hdy.2015.17.
- 941 Kasuga, T., Bui, M., Bernhardt, E., Swiecki, T., Aram, K., Cano, L. M., et al. (2016). Host-  
942 induced aneuploidy and phenotypic diversification in the Sudden Oak Death pathogen  
943 *Phytophthora ramorum*. *BMC Genomics* 17, 1–17. doi:10.1186/s12864-016-2717-z.

- 944 Keller, M. C., Visscher, P. M., and Goddard, M. E. (2011). Quantification of inbreeding due to  
945 distant ancestors and its detection using dense single nucleotide polymorphism data. 189,  
946 237–249. doi:10.1534/genetics.111.130922.
- 947 Kirkpatrick, M., and Jarne, P. (2000). The Effects of a Bottleneck on Inbreeding Depression and  
948 the Genetic Load. *The American Naturalist* 155, 154–167. doi:10.1086/303312.
- 949 Ko, W. (1988). Hormonal heterothallism and homothallism in *Phytophthora*. *Annu. Rev.*  
950 *Phytopathol.* 26, 57–73. doi:10.1146/annurev.phyto.26.1.57.
- 951 Kondrashov, A. S. (1988). Deleterious mutations and the evolution of sexual reproduction.  
952 *Nature* 336, 435–440. doi:10.1038/336435a0.
- 953 Lamour, K. H., and Hausbeck, M. K. (2000). Mefenoxam Insensitivity and the Sexual Stage of  
954 *Phytophthora capsici* in Michigan Cucurbit Fields. *Phytopathology* 90, 396–400.  
955 doi:10.1094/PHTO.2000.90.4.396.
- 956 Lamour, K. H., and Hausbeck, M. K. (2001). Investigating the Spatiotemporal Genetic Structure  
957 of *Phytophthora capsici* in Michigan. *Phytopathology* 91, 973–980.  
958 doi:10.1094/PHTO.2001.91.10.973.
- 959 Lamour, K. H., and Hausbeck, M. K. (2003). Effect of crop rotation on the survival of  
960 *Phytophthora capsici* in Michigan. *Plant Dis.* 87, 841–845. doi:10.1094/pdis.2003.87.7.841.
- 961 Lamour, K. H., Mudge, J., Gobena, D., Hurtado-Gonzales, O. P., Schmutz, J., Kuo, A., et al.  
962 (2012). Genome Sequencing and Mapping Reveal Loss of Heterozygosity as a Mechanism  
963 for Rapid Adaptation in the Vegetable Pathogen *Phytophthora capsici*. *MPMI* 25, 1350–  
964 1360. doi:10.1094/MPMI-02-12-0028-R.
- 965 Lewontin, R. C., and Krakauer, J. (1973). Distribution of gene frequency as a test of the theory  
966 of the selective neutrality of polymorphisms. 74, 175–195.
- 967 Li, H., and Durbin, R. (2009). Fast and accurate short read alignment with Burrows-Wheeler  
968 transform. *Bioinformatics* 25, 1754–1760. doi:10.1093/bioinformatics/btp324.
- 969 Li, Y., Zhou, Q., Qian, K., van der Lee, T., and Huang, S. (2015). Successful asexual lineages of  
970 the Irish potato Famine pathogen are triploid. *bioRxiv*, 024596. doi:10.1101/024596.
- 971 Luikart, G., and Cornuet, J. M. (1999). Estimating the effective number of breeders from  
972 heterozygote excess in progeny. *Genetics* 151, 1211–1216.
- 973 Magwene, P. M., Kayıkçı, Ö., Granek, J. A., Reininga, J. M., Scholl, Z., and Murray, D. (2011).  
974 Outcrossing, mitotic recombination, and life-history trade-offs shape genome evolution in  
975 *Saccharomyces cerevisiae*. *Proc. Natl. Acad. Sci. U.S.A.* 108, 1987–1992.  
976 doi:10.1073/pnas.1012544108.
- 977 Mandegar, M. A., and Otto, S. P. (2007). Mitotic recombination counteracts the benefits of  
978 genetic segregation. *Proceedings of the Royal Society of London B: Biological Sciences* 274,

- 979 1301–1307. doi:10.1098/rspb.2007.0056.
- 980 Marshall, A. R., Knudsen, K. L., and Allendorf, F. W. (2004). Linkage disequilibrium between  
981 the pseudoautosomal PEPB-1 locus and the sex-determining region of chinook salmon.  
982 *Heredity* 93, 85–97. doi:10.1038/sj.hdy.6800483.
- 983 Meirmans, P. G., and van Tienderen, P. H. (2004). GENOTYPE and GENODIVE: two programs  
984 for the analysis of genetic diversity of asexual organisms. *Mol Ecol Notes* 4, 792–794.  
985 doi:10.1111/j.1471-8286.2004.00770.x.
- 986 Milgroom, M. G. (1996). Recombination and the multilocus structure of fungal populations.  
987 *Annu. Rev. Phytopathol.* 34, 457–477. doi:10.1146/annurev.phyto.34.1.457.
- 988 Nunney, L. (2002). The Effective Size of Annual Plant Populations: The Interaction of a Seed  
989 Bank with Fluctuating Population Size in Maintaining Genetic Variation. *The American*  
990 *Naturalist* 160, 195–204. doi:10.1086/341017.
- 991 Pembleton, L. W., Cogan, N. O. I., and Forster, J. W. (2013). StAMPP: an R package for  
992 calculation of genetic differentiation and structure of mixed-ploidy level populations.  
993 *Molecular Ecology Resources* 13, 946–952. doi:10.1111/1755-0998.12129.
- 994 Price, A. L., Patterson, N. J., Plenge, R. M., Weinblatt, M. E., Shadick, N. A., and Reich, D.  
995 (2006). Principal components analysis corrects for stratification in genome-wide association  
996 studies. *Nat Genet* 38, 904–909. doi:10.1038/ng1847.
- 997 Pudovkin, A. I., Zaykin, D. V., and Hedgecock, D. (1996). On the potential for estimating the  
998 effective number of breeders from heterozygote-excess in progeny. *Genetics* 144, 383–387.
- 999 Purcell, S., Neale, B., Todd-Brown, K., Thomas, L., Ferreira, M. A. R., Bender, D., et al. (2007).  
1000 PLINK: A Tool Set for Whole-Genome Association and Population-Based Linkage  
1001 Analyses. *The American Journal of Human Genetics* 81, 559–575. doi:10.1086/519795.
- 1002 R Core Team (2015). R: A language and environment for statistical computing.
- 1003 Robertson, A. (1965). The interpretation of genotypic ratios in domestic animal populations.  
1004 *Animal Production* 7, 319–324. doi:10.1017/s0003356100025770.
- 1005 Rogstad, S. H., Keane, B., and Beresh, J. (2002). Genetic variation across VNTR loci in central  
1006 North American *Taraxacum* surveyed at different spatial scales. *Plant Ecology* 161, 111–  
1007 121. doi:10.1023/A:1020301011283.
- 1008 Rosenblum, E. B., James, T. Y., Zamudio, K. R., Poorten, T. J., Ilut, D., Rodriguez, D., et al.  
1009 (2013). Complex history of the amphibian-killing chytrid fungus revealed with genome  
1010 resequencing data. *Proc. Natl. Acad. Sci. U.S.A.* 110, 9385–9390.  
1011 doi:10.1073/pnas.1300130110.
- 1012 Sansome, E. (1976). Gametangial meiosis in *Phytophthora capsici*. *Canadian Journal of Botany*  
1013 54, 1535–1545. doi:10.1139/b76-168.

- 1014 Sansome, E. (1980). Reciprocal translocation heterozygosity in heterothallic species of  
1015 *Phytophthora* and its significance. *Transactions of the British Mycological Society* 74, 175–  
1016 185. doi:10.1016/S0007-1536(80)80023-4.
- 1017 Satour, M. M., and Butler, E. E. (1967). A root and crown rot of tomato caused by *Phytophthora*  
1018 *capsici* and *P. parasitica*. *Phytopathology* 57, 510–515.
- 1019 Satour, M. M., and Butler, E. E. (1968). *Comparative morphological and physiological studies*  
1020 *of progenies from intraspecific matings of Phytophthora capsici*. *Phytopathology*.
- 1021 Shattock, R. C. (1986). Genetics of *Phytophthora infestans*: Characterization of Single-Oospore  
1022 Cultures from A1 Isolates Induced to Self by Intraspecific Stimulation. *Phytopathology* 76,  
1023 407. doi:10.1094/phyto-76-407.
- 1024 Skidmore, D. I., Shattock, R. C., and Shaw, D. S. (1984). Oospores in cultures of *Phytophthora*  
1025 *infestans* resulting from selfing induced by the presence of *P. drechsleri* isolated from  
1026 blighted potato foliage. *Plant Pathology* 33, 173–183. doi:10.1111/j.1365-  
1027 3059.1984.tb02637.x.
- 1028 Stacklies, W., Redestig, H., Scholz, M., Walther, D., and Selbig, J. (2007). pcaMethods--a  
1029 bioconductor package providing PCA methods for incomplete data. *Bioinformatics* 23,  
1030 1164–1167. doi:10.1093/bioinformatics/btm069.
- 1031 Templeton, A. R., and Levin, D. A. (1979). Evolutionary Consequences of Seed Pools. *The*  
1032 *American Naturalist* 114, 232–249. doi:10.1086/283471.
- 1033 Tian, D., and Babadoost, M. (2004). Host range of *Phytophthora capsici* from pumpkin and  
1034 pathogenicity of isolates. *Plant Dis.* 88, 485–489. doi:10.1094/pdis.2004.88.5.485.
- 1035 Uchida, J. Y., and Aragaki, M. (1980). Chemical stimulation of oospore formation in  
1036 *Phytophthora capsici*. *Mycologia* 72, 1103. doi:10.2307/3759563.
- 1037 Wang, J. (2014). Marker-based estimates of relatedness and inbreeding coefficients: an  
1038 assessment of current methods. *J. Evol. Biol.* 27, 518–530. doi:10.1111/jeb.12315.
- 1039 Waples, R. S. (2006). Seed Banks, Salmon, and Sleeping Genes: Effective Population Size in  
1040 Semelparous, Age-Structured Species with Fluctuating Abundance. *The American Naturalist*  
1041 167, 118–135. doi:10.1086/498584.
- 1042 Waples, R. S. (2014). Testing for Hardy-Weinberg Proportions: Have We Lost the Plot? *Journal*  
1043 *of Heredity* 106, 1–19. doi:10.1093/jhered/esu062.
- 1044 Weir, B. S., and Cockerham, C. C. (1984). Estimating F-Statistics for the Analysis of Population  
1045 Structure. *Evolution* 38, 1358. doi:10.2307/2408641.
- 1046 Wigginton, J. E., Cutler, D. J., and Abecasis, G. R. (2005). A Note on Exact Tests of Hardy-  
1047 Weinberg Equilibrium. *The American Journal of Human Genetics* 76, 887–893.  
1048 doi:10.1086/429864.

- 1049 Wright, S. (1921). Systems of Mating. II. The Effects of Inbreeding on the Genetic Composition  
1050 of a Population. *Genetics* 6, 124–143.
- 1051 Wright, S. P. (1992). Adjusted p-values for simultaneous inference. *Biometrics* 48, 1005.  
1052 doi:10.2307/2532694.
- 1053 Yoshida, K., Schuenemann, V. J., Cano, L. M., Pais, M., Mishra, B., Sharma, R., et al. (2013).  
1054 The rise and fall of the *Phytophthora infestans* lineage that triggered the Irish potato famine.  
1055 *Elife* 2, 403–25. doi:10.7554/eLife.00731.
- 1056 Zhang, N., McCarthy, M. L., and Smart, C. D. (2008). A microarray system for the detection of  
1057 fungal and oomycete pathogens of solanaceous crops. *Plant Dis.* 92, 953–960.  
1058 doi:10.1094/pdis-92-6-0953.
- 1059 **Supplementary Materials**  
1060 **Supplementary Text. Additional methods and results.**  
1061 **Supplementary Tables S1-S8.**  
1062 **Supplementary Figures S1-S18.**
